# Supplementary material
Source: ML conference proceedings conference paper supplement (https://proceedings.mlr.press/v48/kapralov16.html)
Supplement: Supplementary file [file kapralov16-supp.pdf]

# 1 Proof of main theorem

The main result of this section is

**Theorem 1.** *There exists an absolute constant  $C > 0$  such that for every  $\delta \in (0, 1)$ , every integer  $1 \leq m \leq n^4$  and every matrix  $U \in \mathbb{R}^{n \times d}$  with orthonormal columns, if  $B \geq \frac{1}{\delta} C (\log n)^4 \cdot d^2 \cdot m^{1/2}$ ,  $S \in \mathbb{R}^{B \times n}$  is a random CountSketch matrix, and  $G \in \mathbb{R}^{m \times B}$  and  $\tilde{G} \in \mathbb{R}^{m \times n}$  are matrices of i.i.d. unit variance Gaussians, then the total variation distance between the joint distribution  $GSU$  and  $\tilde{G}U$  is less than  $\delta$ .*

**Remark 2.** Note that we restrict the range of values of  $m$  in Theorem 1 to  $[1 : n^4]$ . This is because if  $m > n^4$ , the theorem requires  $B \gg \frac{1}{\delta} n^2$ , at which point the CountSketch matrix  $S$  becomes an isometry of  $\mathbb{R}^n$  with high probability and the theorem follows immediately. At the same time restricting  $m$  to be bounded by a small polynomial of  $n$  simplifies the proof of Theorem 1 notationally.

Recall that a CountSketch matrix  $S \in \mathbb{R}^{B \times n}$  is a matrix all of whose columns have exactly one nonzero in a random location, and the value of the nonzero element is independently chosen to be  $-1$  or  $+1$ . All random choices are made independently. Throughout this section we denote the number of rows in the CountSketch matrix by  $B$ . Note that the matrix  $S$  is a random variable. Let  $G$  denote an  $m \times B$  matrix of independent Gaussians. For an  $n \times d$  matrix  $U$  with orthonormal columns let  $q : \mathbb{R}^d \rightarrow \mathbb{R}_+$  denote the p.d.f. of the random variable  $G_1 S U$ , where  $G_1$  is the first row of  $G$  (all rows have the same distribution and are independent). We note that  $G_1 S U$  is a mixture of Gaussians. Indeed, for any fixed  $S$  the distribution of  $G_1 S U$  is normal with covariance matrix  $(G_1 S U)^T (G_1 S U) = U^T S^T S U$ . We denote the distribution of  $G_1 S U$  given  $S$  by

$$q_S(x) := \frac{1}{\sqrt{(2\pi)^d \det M}} e^{-\frac{1}{2} x^T M^{-1} x}.$$

Throughout this section we use the notation  $M := U^T S^T S U$ . Note that since  $S$  is a random variable,  $M$  is as well. With this notation in place we have for any  $x \in \mathbb{R}^d$

$$q(x) = \mathbf{E}_S [q_S(x)]. \tag{1}$$

Let  $p : \mathbb{R}^d \rightarrow \mathbb{R}_+$  denote the pdf of the isotropic Gaussian distribution, i.e. for all  $x \in \mathbb{R}^d$

$$p(x) = \frac{1}{\sqrt{(2\pi)^d}} e^{-\frac{1}{2} x^T x}. \tag{2}$$

Before giving a proof of Theorem 1, which is somewhat involved, we give a simple proof of a weaker version of the theorem, where the number of buckets  $B$  of our CountSketch matrix is required to be  $\approx \frac{1}{\delta} d^2 m$  as opposed to  $\approx \frac{1}{\delta} d^2 \sqrt{m}$ :

**Theorem 3.** *There exists an absolute constant  $C > 0$  such that for every  $\delta \in (0, 1)$ , every integer  $m \geq 1$  and every matrix  $U \in \mathbb{R}^{n \times d}$  with orthonormal columns if  $B \geq \frac{1}{\delta^2} C d^2 \cdot m$ ,  $S \in \mathbb{R}^{B \times n}$  is a random CountSketch matrix, and  $G \in \mathbb{R}^{m \times B}$  and  $\tilde{G} \in \mathbb{R}^{m \times n}$  are matrices of i.i.d. unit variance Gaussians, then the total variation distance between the joint distribution  $GSU$  and  $\tilde{G}U$  is less than  $\delta$ .*

We will use the following measures of distance between two distribution in the proof of our main theorem (Theorem 1) as well as the proof of Theorem 3.

**Definition 4** (Kullback-Leibler divergence). The Kullback-Leibler (KL) divergence between two random variables  $P, Q$  with probability density functions  $p(x), q(x) \in \mathbb{R}^d$  is given by  $D_{KL}(P||Q) = \int_{\mathbb{R}^d} p(x) \ln \frac{p(x)}{q(x)} dx$

**Definition 5** (Total variation distance). The total variation distance between two random variables  $P, Q$  with probability density functions  $p(x), q(x) \in \mathbb{R}^d$  is given by  $D_{TV}(P, Q) = \frac{1}{2} \int_{\mathbb{R}^d} |p(x) - q(x)| dx$ .

**Theorem 6** (Pinsker's inequality). *For any two random variables  $P, Q$  with probability density functions  $p(x), q(x) \in \mathbb{R}^d$  one has  $D_{TV}(P, Q) \leq \sqrt{\frac{1}{2} D_{KL}(P||Q)}$ .*

The proof of Theorem 3 uses the following simple claim.

**Claim 7** (KL divergence between multivariate Gaussians). *Let  $X \sim N(0, I_d)$  and  $Y \sim N(0, \Sigma)$ . Then  $D_{KL}(X||Y) = \frac{1}{2}\text{Tr}(\Sigma^{-1} - I) + \frac{1}{2}\ln \det \Sigma$ .*

*Proof.* One has

$$\begin{aligned} D_{KL}(X||Y) &= \mathbf{E}_{X \sim N(0, I_d)} \left[ -\frac{1}{2}X^T X + \frac{1}{2}X^T \Sigma^{-1} X + \frac{1}{2} \ln \det \Sigma \right] \\ &= \mathbf{E}_{X \sim N(0, I_d)} \left[ \frac{1}{2}X^T (\Sigma^{-1} - I) X + \frac{1}{2} \ln \det \Sigma \right] \\ &= \frac{1}{2} \mathbf{E}_{X \sim N(0, I_d)} [\text{Tr}((\Sigma^{-1} - I) X X^T)] + \frac{1}{2} \ln \det \Sigma \\ &= \frac{1}{2} \text{Tr}(\Sigma^{-1} - I) + \frac{1}{2} \ln \det \Sigma, \end{aligned}$$

where we used the fact that for a vector  $X$  of independent Gaussians of unit variance one has  $\mathbf{E}_X[X^T A X] = \text{Tr}(A)$  for any symmetric  $A$  (by rotational invariance of the Gaussian distribution).  $\square$

We can now give

**Proof of Theorem 3:** One has by Lemma 21, **(1)** (see below; this is a standard property of the CountSketch matrix) that for any  $U \in \mathbb{R}^{n \times d}$  with orthonormal columns, and  $B \geq 1$ , if  $S$  is a random CountSketch matrix and  $M = U^T S^T S U$ , then  $\mathbf{E}_S[\|M - I\|_F^2] = O(d^2/B)$ . By Markov's inequality  $\mathbf{Pr}_S[\|I - M\|_F > (2/\delta) \cdot O(d^2/B)] < \delta/2$ . Let  $\mathcal{E}$  denote the event that  $\|I - M\|_F \leq (2/\delta) \cdot O(d^2/B)$ . We condition on  $\mathcal{E}$  in what follows. Since  $B \geq \frac{1}{\delta^3} C d^2 m$  for a sufficiently large absolute constant  $C > 1$ , we have, conditioned on  $\mathcal{E}$ , that

$$\|I - M\|_F^2 \leq (2/\delta) \cdot O(d^2/B) = (2/\delta) \cdot \delta^3 / (Cm) \leq 2\delta^2 / (Cm). \quad (3)$$

Note that in particular we have  $\|I - M\| \leq \|I - M\|_F < 1/2$  conditioned on  $\mathcal{E}$  as long as  $C > 1$  is larger than an absolute constant.

By Claim 7 we have  $D_{KL}(X||Y) = \frac{1}{2}\text{Tr}(I - \Sigma^{-1}) + \frac{1}{2}\ln \det \Sigma$ . We now use Taylor expansions of matrix inverse and log det provided by Claim 9 and Claim 10 (see below) to obtain

$$\begin{aligned} D_{KL}(X||Y) &= \frac{1}{2}\text{Tr}(M^{-1} - I) + \frac{1}{2}\ln \det M \\ &= \frac{1}{2}\text{Tr} \left( \sum_{k \geq 1} (I - M)^k \right) + \frac{1}{2} \sum_{k \geq 1} (-\text{Tr}((I - M)^k) / k) \\ &= \frac{1}{2}\text{Tr} \left( \sum_{k \geq 2} (I - M)^k \right) + \frac{1}{2} \sum_{k \geq 2} (-\text{Tr}((I - M)^k) / k) \\ &= O(\text{Tr}((I - M)^2)) \quad (\text{since } \|I - M\|_2 \leq \|I - M\|_F < 1/2) \\ &= O(\|I - M\|_F^2) \\ &= O(2\delta^2 / (Cm)) \quad (\text{by (3)}) \\ &\leq (\delta/4)^2 / m \end{aligned} \quad (4)$$

as long as  $C > 1$  is larger than an absolute constant. This shows that for every  $S \in \mathcal{E}$  one has  $D_{KL}(p||q_S) \leq (\delta/4)^2 / m$ , and thus  $D_{KL}(p||\tilde{q}|\mathcal{E}) \leq (\delta/4)^2 / m$ , where we let  $\tilde{q}(x) := \mathbf{E}_S[q_S(x)|\mathcal{E}]$ .

We now observe that the vectors  $(G_i S U)_{i=1}^m$  and  $(\tilde{G}_i U)_{i=1}^m$  are vectors of independent samples from distributions  $q(x)$  and  $p(x)$  respectively. We denote the corresponding product distributions by  $q^m$  and  $p^m$ . Since the good event  $\mathcal{E}$  constructed above occurs with probability at least  $1 - \delta/2$ , it suffices to consider the distributions  $\tilde{q}(x)$  and  $p(x)$ , as

$$D_{TV}(q^m, p^m) \leq \mathbf{Pr}[\bar{\mathcal{E}}] + D_{TV}(q^m, p^m|\mathcal{E}) = \mathbf{Pr}[\bar{\mathcal{E}}] + D_{TV}(\tilde{q}^m, p^m), \quad (5)$$

where  $D_{TV}(q^m, p^m | \mathcal{E}) = D_{TV}(\tilde{q}^m, p^m)$  stands for the total variation distance between the distribution of  $(\tilde{G}_i U)_{i=1}^m$  and the distribution of  $(G_i S U)_{i=1}^m$  conditioned on  $S \in \mathcal{E}$ . We can now use the estimate from (4) to get

$$\begin{aligned}
D_{TV}(\tilde{q}^m, p^m) &\leq \sqrt{\frac{1}{2} D_{KL}(p^m || \tilde{q}^m)} \quad (\text{by Pinsker's inequality}) \\
&= \sqrt{\frac{m}{2} D_{KL}(p || \tilde{q})} \quad (\text{by additivity of KL divergence over product spaces}) \\
&\leq \sqrt{\frac{m}{2} \cdot (\delta/4)^2 / m} \quad (\text{by (4)}) \\
&\leq \delta/4.
\end{aligned} \tag{6}$$

□

The main source of hardness in proving the stronger result provided by Theorem 1 comes from the fact that unlike the setting of Theorem 3, where most elements in the mixture are close to isotropic Gaussians in KL divergence, in the setting of Theorem 1 most elements of the mixture are too far from isotropic Gaussians to establish our result directly (this can be seen by verifying that the bounds of Theorem 3 on the KL divergence of  $q_S$  to  $p$  are essentially tight). Thus, the main technical challenge in proving Theorem 1 consists of analyzing the effect of averaging over random CountSketch matrices that is involved in the definition of  $q(x)$  in (1). The core technical result behind the proof of Theorem 1 is Lemma 8, stated below. Ideally, we would like a lemma that states that the ratio of the pdfs  $q(x)/p(x)$  is very close to 1 for ‘typical’ values of  $x$  (for appropriate definition of a set of ‘typical’  $x$ ). Unfortunately, it is not clear how to achieve this result for the distribution  $q(x)$  defined in (1). The problem is that some choices of CountSketch matrices  $S$  may lead to degenerate Gaussian distributions that are hard to analyze. For example, when  $S$  is not a subspace embedding, the matrix  $M$  may even be rank-deficient, and the inverse  $M^{-1}$  is then ill-defined. To avoid these issues, we work with an alternative definition. Specifically, instead of averaging the distributions  $\frac{1}{\sqrt{(2\pi)^d \det M}} e^{-\frac{1}{2} x^T M^{-1} x}$  over all CountSketch matrices, we define a high probability event  $\mathcal{E}$  in the space of matrices  $S$  (see Lemma 8 for the definition) and reason about the modified distribution  $\tilde{q}(x)$  defined as

$$\tilde{q}(x) = \mathbf{E}_S \left[ \frac{1}{\sqrt{(2\pi)^d \det M}} e^{-\frac{1}{2} x^T M^{-1} x} \middle| \mathcal{E} \right]. \tag{7}$$

For technical reasons it turns out to be useful to define yet another distribution

$$q'(x) = \mathbf{E}_S \left[ \frac{1}{\sqrt{(2\pi)^d \det M}} e^{-\frac{1}{2} x^T M^{-1} x} \cdot \mathbf{I}[x \in \mathcal{T}(S, U)] \middle| \mathcal{E} \right] + \xi \cdot p(x), \tag{8}$$

where  $\xi = \mathbf{E}_S [\mathbf{Pr}_{X \sim q_S}[X \notin \mathcal{T}(S, U)] | \mathcal{E}] \leq n^{-20}$  and for each  $S \in \mathcal{E}$  and  $U$  with orthonormal columns the set  $\mathcal{T}(S, U)$  (see Definition 12) is an appropriately defined set of  $x \in \mathbb{R}^d$  that are ‘typical’ for  $S$  and  $U$ . We first note that  $q'$  is indeed the p.d.f. of a distribution. First, it is clear that  $q'(x) \geq 0$  for all  $x$ . Second, we

have

$$\begin{aligned}
\int_{\mathbb{R}^d} q'(x) dx &= \int_{\mathbb{R}^d} \mathbf{E}_S \left[ \frac{1}{\sqrt{(2\pi)^d \det M}} e^{-\frac{1}{2}x^T M^{-1}x} \cdot \mathbf{I}[x \in \mathcal{T}(S, U)] \middle| \mathcal{E} \right] + \xi \cdot \int_{\mathbb{R}^d} p(x) dx \\
&= 1 - \int_{\mathbb{R}^d} \mathbf{E}_S \left[ \frac{1}{\sqrt{(2\pi)^d \det M}} e^{-\frac{1}{2}x^T M^{-1}x} \cdot \mathbf{I}[x \notin \mathcal{T}(S, U)] \middle| \mathcal{E} \right] + \xi \\
&= 1 - \mathbf{E}_S \left[ \int_{\mathbb{R}^d} \frac{1}{\sqrt{(2\pi)^d \det M}} e^{-\frac{1}{2}x^T M^{-1}x} \cdot \mathbf{I}[x \notin \mathcal{T}(S, U)] dx \middle| \mathcal{E} \right] + \xi \\
&= 1 - \mathbf{E}_S \left[ \int_{\mathbb{R}^d \setminus \mathcal{T}(S, U)} \frac{1}{\sqrt{(2\pi)^d \det M}} e^{-\frac{1}{2}x^T M^{-1}x} dx \middle| \mathcal{E} \right] + \xi \\
&= 1 - \mathbf{E}_S [\mathbf{Pr}_{X \sim q_S}[X \notin \mathcal{T}(S, U)] | \mathcal{E}] + \xi \\
&= 1, \quad (\text{by definition of } \xi)
\end{aligned}$$

as required.

As we show below, the total variation distance between  $q'$  and  $\tilde{q}$  is a small  $n^{-10}$ , so working with  $q'$  suffices. The main argument of our proof shows that the distribution  $q'(x)$  is close to  $p(x)$  for ‘typical’  $x \in \mathbb{R}^d$ . Then since  $q'$  is close to  $\tilde{q}$  and the event  $\mathcal{E}$  occurs with high probability, this suffices for a proof of Theorem 1. Formally, the core technical result behind the proof of Theorem 1 is

**Lemma 8.** *There exists an absolute constant  $C > 0$  such that for every  $\delta \in (0, 1)$  and every matrix  $U \in \mathbb{R}^{n \times d}$  with orthonormal columns if  $B \geq \frac{1}{\delta} C (\log n)^4 d^2$  there exists a set  $\mathcal{E}$  of CountSketch matrices and a subset  $\mathcal{T}^* \subseteq \mathbb{R}^d$  that satisfies  $\mathbf{Pr}_{X \sim p}[X \notin \mathcal{T}^*] \leq n^{-10}$  and  $\mathbf{Pr}_{X \sim \tilde{q}}[X \notin \mathcal{T}^*] \leq n^{-10}$  such that if  $S \in \mathbb{R}^{B \times n}$  is a random CountSketch matrix, then **(1)**  $\mathbf{Pr}_S[\mathcal{E}] \geq 1 - \delta/3$ , and **(2)** for all  $x \in \mathcal{T}^*$  one has*

$$\left| \frac{q'(x)}{p(x)} - 1 \right| \leq O((d^2 \log^4 n)/B) + O(n^{-10}).$$

We now prove Theorem 1 assuming Lemma 8 and Claim 15. After this, we then prove Lemma 8 and Claim 15. We now give

**Proof of Theorem 1:** The proof relies on the observation that the vectors  $(G_i S U)_{i=1}^m$  and  $(\tilde{G}_i U)_{i=1}^m$  are vectors of independent samples from distributions  $q(x)$  and  $p(x)$  respectively. We denote the corresponding product distributions by  $q^m$  and  $p^m$ . Since the good event  $\mathcal{E}$  constructed in Lemma 8 occurs with probability at least  $1 - \delta/3$ , it suffices to consider the distributions  $\tilde{q}(x)$  and  $p(x)$ , as

$$D_{TV}(q^m, p^m) \leq \mathbf{Pr}[\bar{\mathcal{E}}] + D_{TV}(\tilde{q}^m, p^m | \mathcal{E}), \tag{9}$$

where  $D_{TV}(\tilde{q}^m, p^m | \mathcal{E})$  stands for the total variation distance between the distribution of  $(\tilde{G}_i U)_{i=1}^m$  and the distribution of  $(G_i S U)_{i=1}^m$  conditioned on  $S \in \mathcal{E}$ . Further, we have by the triangle inequality

$$D_{TV}(\tilde{q}^m, p^m | \mathcal{E}) \leq D_{TV}((q')^m, p^m | \mathcal{E}) + D_{TV}(\tilde{q}^m, (q')^m | \mathcal{E}) \leq D_{TV}((q')^m, p^m | \mathcal{E}) + m \cdot n^{-10}, \tag{10}$$

since  $D_{TV}(\tilde{q}^m, (q')^m | \mathcal{E}) \leq m D_{TV}(\tilde{q}, q' | \mathcal{E}) \leq mn^{-10}$ , where  $D_{TV}(\tilde{q}, q' | \mathcal{E}) \leq n^{-10}$  by Claim 15 below.

We first prove, using Lemma 8, that the KL divergence between  $p(x)$  and  $q'(x)$  restricted to the set  $\mathcal{T}^*$  (whose existence is guaranteed by Lemma 8) is bounded by  $O(((d \log n)^2/B)^2)$ . Specifically, let

$$p_*(x) := \begin{cases} p(x)/\mathbf{Pr}_{X \sim p}[\mathcal{T}^*] & \text{if } x \in \mathcal{T}^* \\ 0 & \text{o.w.} \end{cases} \tag{11}$$

and

$$q'_*(x) := \begin{cases} q'(x)/\mathbf{Pr}_{X \sim q'}[\mathcal{T}^*] & \text{if } x \in \mathcal{T}^* \\ 0 & \text{o.w.} \end{cases} \tag{12}$$

Since  $\mathcal{T}^*$  occurs with probability at least  $1 - 1/n^{10}$  under both  $\tilde{q}(x)$  and  $p(x)$  by Lemma 19, it suffices to bound the total variation distance between the product of  $m$  independent copies of  $q'_*(x)$  and  $m$  independent copies of  $p_*(x)$ . Specifically,

$$\begin{aligned} D_{TV}((q'_*)^m, p_*^m | \mathcal{E}) &\leq D_{TV}((q'_*)^m, p_*^m | (\mathcal{T}^*)^m) + m \Pr[q'(\mathbb{R}^d \setminus \mathcal{T}^*)] + m \Pr[p(\mathbb{R}^d \setminus \mathcal{T}^*)] \\ &\leq D_{TV}((q'_*)^m, p_*^m) + 2mn^{-10}, \quad (\text{by Lemma 19}) \end{aligned} \quad (13)$$

where we used the fact that  $q'_*$  and  $p_*$  are supported on  $\mathcal{T}^*$ . Note that both distributions are still product distributions. By Pinsker's inequality and the product structure we thus get

$$\begin{aligned} D_{TV}((q'_*)^m, p_*^m) &\leq \sqrt{\frac{1}{2} D_{KL}((q'_*)^m || p_*^m)} \quad (\text{by Pinsker's inequality}) \\ &= \sqrt{\frac{m}{2} D_{KL}(q'_* || p_*)} \quad (\text{by additivity of KL divergence over product spaces}) \end{aligned} \quad (14)$$

In what follows we bound  $D_{KL}(q'_* || p_*)$ . By Lemma 8 we have for every  $x \in \mathcal{T}^*$  that

$$|q'(x)/p(x) - 1| \leq O((d^2 \log^4 n)/B) + O(n^{-10}), \quad (15)$$

so

$$\begin{aligned} |q'_*(x)/p_*(x) - 1| &= \left| (q'(x)/p(x)) \cdot \frac{\Pr_{X \sim q'}[\mathcal{T}^*]}{\Pr_{X \sim p}[\mathcal{T}^*]} - 1 \right| = \frac{\Pr_{X \sim q'}[\mathcal{T}^*]}{\Pr_{X \sim p}[\mathcal{T}^*]} \cdot \left| (q'(x)/p(x)) - \frac{\Pr_{X \sim p}[\mathcal{T}^*]}{\Pr_{X \sim q'}[\mathcal{T}^*]} \right| \\ &\leq \frac{\Pr_{X \sim q'}[\mathcal{T}^*]}{\Pr_{X \sim p}[\mathcal{T}^*]} \cdot \left( |q'(x)/p(x) - 1| + \left| 1 - \frac{\Pr_{X \sim p}[\mathcal{T}^*]}{\Pr_{X \sim q'}[\mathcal{T}^*]} \right| \right) \\ &= (1 + O(n^{-10})) \cdot (|q'(x)/p(x) - 1| + O(n^{-10})) \\ &= O((d^2 \log^4 n)/B) + O(n^{-10}). \quad (\text{by (15)}) \end{aligned}$$

Since  $B \geq \frac{1}{8} C d^2 \log^4 n$  for a sufficiently large constant  $C > 0$  by assumption of the theorem, we get that

$$O((d^2 \log^4 n)/B) + O(n^{-10}) < O(1/C) + O(n^{-10}) < 1/2.$$

We thus get, using the bound  $|1/(1+x) - 1| \leq 2|x|$  for  $|x| \leq 1/2$ ,

$$\begin{aligned} |p_*(x)/q'_*(x) - 1| &= \left| \frac{1}{q'_*(x)/p_*(x)} - 1 \right| = \left| \frac{1}{1 + (q'_*(x)/p_*(x) - 1)} - 1 \right| \\ &= O(|q'_*(x)/p_*(x) - 1|) \\ &= O((d^2 \log^4 n)/B) + O(n^{-10}) \end{aligned} \quad (16)$$

We now use the fact that  $|\ln(1+x) - x| \leq 2x^2$  for all  $x \in (-1/10, 1/10)$  to upper bound  $D_{KL}(q'_* || p_*)$ . Specifically, we have

$$\begin{aligned} D_{KL}(q'_* || p_*) &= \mathbf{E}_{X \sim q'_*}[\ln(q'_*(X)/p_*(X))] \leq -\mathbf{E}_{X \sim q'_*}[\ln(p_*(X)/q'_*(X))] \\ &\leq -\mathbf{E}_{X \sim q'_*}[(p_*(x)/q'_*(x) - 1) - (p_*(x)/q'_*(x) - 1)^2] \\ &\leq -\mathbf{E}_{X \sim q'_*}[p_*(x)/q'_*(x) - 1] + \mathbf{E}_{X \sim q'_*}[(p_*(x)/q'_*(x) - 1)^2] \\ &= -(1 - 1) + \mathbf{E}_{X \sim q'_*}[(p_*(x)/q'_*(x) - 1)^2] \\ &= \mathbf{E}_{X \sim q'_*}[(p_*(x)/q'_*(x) - 1)^2] \\ &= O(((d^2 \log^4 n)/B)^2 + n^{-10}) \quad (\text{by (16)}) \end{aligned} \quad (17)$$

Since  $B \geq \frac{1}{8} C (\log n)^4 d^2 \cdot m^{1/2}$  for a sufficiently large constant  $C > 0$  by assumption of the theorem, substituting the bound of (17) into (14), we get

$$D_{TV}((q'_*)^m, p_*^m) \leq \sqrt{\frac{m}{2} D_{KL}(q'_* || p_*)} \leq \sqrt{\frac{m}{2} \cdot O(((d^2 \log^4 n)/B)^2 + n^{-10})} \leq \sqrt{\frac{m}{2} \cdot \delta^2 / (8m)} \leq \delta/2.$$

Putting this together with (13), (10) and (9) using the assumption that  $m \leq n^4$  gives the result.  $\square$   
The rest of the section is devoted to proving Lemma 8, i.e. bounding

$$q'(x)/p(x) = \mathbf{E}_S \left[ \exp \left( \frac{1}{2} x^T x - \frac{1}{2} x^T M^{-1} x - \frac{1}{2} \log \det M \right) \cdot \mathbf{I}[x \in \mathcal{T}(S, U)] \middle| \mathcal{E} \right] + \xi, \quad (18)$$

where  $\xi = \mathbf{E}_S [\mathbf{Pr}_{X \sim q_S}[X \notin \mathcal{T}(S, U)] | \mathcal{E}] \leq n^{-20}$ , for ‘typical’  $x$  sampled from the Gaussian distribution (i.e.  $x \in \mathcal{T}^*$  – see formal definition below).

**Organization.** The rest of this section is organized as follows. We start by defining the set  $\mathcal{E}$  of ‘nice’ CountSketch matrices in section 1.1, and proving that a random CountSketch matrix is likely to be ‘nice’. We will in fact define a parameterized set  $\mathcal{E}(\gamma)$  in terms of a parameter  $\gamma$ . In section 1.2 we define, for each matrix  $U$  (which can be thought of as fixed throughout our analysis) with orthonormal columns and CountSketch matrix  $S$ , a set  $\mathcal{T}(S, U)$  of  $x \in \mathbb{R}^d$  that are ‘typical’ for  $S$  and  $U$ . The ratio of pdfs in (18) can be approximated well by a Taylor expansion **for such ‘typical’**  $x \in \mathcal{T}(S, U)$ . These Taylor expansions are developed in section 1.3 and form the basis of our proof. Unfortunately, these Taylor expansions are valid only for  $x \in \mathcal{T}(S, U)$ , i.e. for  $x$  that are ‘typical’ with respect to a given  $S$ . To complete the proof, we need to construct a universal ‘typical’ set  $\mathcal{T}^*(U, \gamma)$  of  $x \in \mathbb{R}^d$ , again parameterized in terms of a parameter  $\gamma$ , that will allow for approximation via Taylor expansions for **all**  $x \in \mathcal{T}^*(U, \gamma)$  **and**  $S \in \mathcal{E}(\gamma)$ . We construct such a set  $\mathcal{T}^*(U, \gamma)$  in section 1.4. Finally, the proof of Lemma 8 is given in section 1.5.

## 1.1 Typical set $\mathcal{E}$ of CountSketch matrices and its properties

Our analysis of (18) starts by Taylor expanding  $M^{-1}$  and  $\det M$  around the identity matrix. We now state the Taylor expansions, and define a (family of) high probability events  $\mathcal{E}(\gamma)$  (equivalently, sets of ‘typical’ CountSketch matrices) such that the Taylor expansions are valid for matrices  $M \in \mathcal{E}(\gamma)$  for all sufficiently small  $\gamma$ .<sup>1</sup> The Taylor expansions that we use are given by

**Claim 9.** For any matrix  $M$  with  $\|I - M\| < 1/2$  one has  $M^{-1} = (I - (I - M))^{-1} = \sum_{k \geq 0} (I - M)^k$ .

**Claim 10.** For any matrix  $M$  with  $\|I - M\| < 1/2$  one has  $\log \det M = \log \det(I - (I - M)) = \sum_{k \geq 1} -\text{Tr}((I - M)^k)/k$ .

For a parameter  $\gamma \in (0, 1)$  that we will later set to  $1/\text{poly}(\log n)$ , define event  $\mathcal{E}(\gamma)$  as

$$\mathcal{E}(\gamma) := \{ \|I - M\|_F^2 \leq \gamma^2 \quad \text{and} \quad |\text{Tr}(I - M)| \leq \gamma \}. \quad (19)$$

The events  $\mathcal{E}(\gamma)$  occur with high probability even for fairly small  $\gamma$  as long as  $B$  is sufficiently large:

**Claim 11.** For any matrix  $U \in \mathbb{R}^{n \times d}$  with orthonormal columns, any  $B \times n$  CountSketch matrix  $S$  we have  $\mathbf{Pr}[\mathcal{E}(\gamma)] \geq 1 - 3(d/\gamma)^2/B$ .

*Proof.* By Lemma 21 below, we have  $\mathbf{E}_S[\|I - M\|_F^2] \leq 2d^2/B$ . Applying Markov’s inequality to  $\|I - M\|_F^2$ , we get

$$\mathbf{Pr}[\|I - M\|_F^2 \geq \gamma^2] \leq \mathbf{Pr}[\|I - M\|_F^2 \geq \gamma^2(B/(2d^2))] \cdot \mathbf{E}[\|I - M\|_F^2] \leq 2(d/\gamma)^2/B$$

as required.

We also have by Lemma 21 (fifth bound) that  $\mathbf{E}_S[(\text{Tr}(I - M))^2] \leq d^2/B$ . Applying Markov’s inequality to  $(\text{Tr}(I - M))^2$ , we get

$$\mathbf{Pr}[|\text{Tr}(I - M)| \geq \gamma] = \mathbf{Pr}[(\text{Tr}(I - M))^2 \geq \gamma^2] \leq \mathbf{Pr}[(\text{Tr}(I - M))^2 \geq \gamma^2(B/(d^2))] \cdot \mathbf{E}[(\text{Tr}(I - M))^2] \leq (d/\gamma)^2/B.$$

A union bound over the two events gives the result.  $\square$

<sup>1</sup>Note that we use the notation  $S \in \mathcal{E}(\gamma)$  and  $M \in \mathcal{E}(\gamma)$  interchangeably. This is fine since  $M = U^T S^T S U$  and the matrix  $U$  is fixed.

## 1.2 Typical sets $\mathcal{T}(S, U)$ and their properties

In order to construct a single typical set  $\mathcal{T}^*$ , we will need the following simple definitions of sets  $\mathcal{T}(S, U)$  of  $x \in \mathbb{R}^d$  that are ‘typical’ for a given CountSketch matrix (as opposed to the set  $\mathcal{T}^*$  whose existence is guaranteed by Lemma 8, which contains  $x$  that are ‘typical’ for **all matrices**  $S \in \mathcal{E}$  **simultaneously**). We will use

**Definition 12** (Typical  $x$ ). For any orthonormal matrix  $U \in \mathbb{R}^{n \times d}$  and CountSketch matrix  $S$  we define

$$\mathcal{T}(S, U) := \left\{ x \in \mathbb{R}^d : |x^T(I - M)x| \leq \frac{1}{100} \text{ and } |x^T(I - M)^2x| \leq \frac{1}{100} \right\},$$

The following claim will be useful in what follows. Its (simple) proof is given in the appendix:

**Claim 13.** For any matrix  $U \in \mathbb{R}^{n \times d}$  with orthonormal columns and any CountSketch matrix  $S \in \mathbb{R}^{B \times n}$  one has  $\|I - M\|_F^2 \leq 4n^3$ .

The following claim is crucial to our analysis. A detailed proof is given in the appendix.

**Claim 14.** For any matrix  $U \in \mathbb{R}^{n \times d}$  with orthonormal columns, every  $\gamma \leq 1/\log^2 n$ , every CountSketch matrix  $S \in \mathcal{E}(\gamma)$  one has **(1)**  $\Pr_{X \sim N(0, I_d)}[X \notin \mathcal{T}(S, U)] < n^{-40}$  and **(2)** for any CountSketch matrix  $S' \in \mathcal{E}(\gamma)$ ,  $M' = U^T S'^T S' U$  one has  $\Pr_{X \sim N(0, M')}[X \notin \mathcal{T}(S, U)] < n^{-40}$  for sufficiently large  $n$ .

Using the claim above we get

**Claim 15.** The total variation distance between  $\tilde{q}$  (defined in (7)) and  $q'$  (defined in (8)) is at most  $n^{-10}$ . Further,  $\xi \leq n^{-40}$ .

*Proof.* We have

$$\begin{aligned} D_{TV}(\tilde{q}, q') &\leq 2\xi \leq 2 \int_{\mathbb{R}^d} \mathbf{E}_S \left[ \frac{1}{\sqrt{(2\pi)^d \det M}} e^{-\frac{1}{2}x^T M^{-1}x} \cdot \mathbf{I}[x \notin \mathcal{T}(S, U)] \Big| \mathcal{E}(\gamma) \right] dx \\ &= 2\mathbf{E}_S \left[ \int_{\mathbb{R}^d} \frac{1}{\sqrt{(2\pi)^d \det M}} e^{-\frac{1}{2}x^T M^{-1}x} \cdot \mathbf{I}[x \notin \mathcal{T}(S, U)] dx \Big| \mathcal{E}(\gamma) \right] \\ &= 2\mathbf{E}_S [\Pr_{X \sim N(0, M)}[x \notin \mathcal{T}(S, U)] \Big| \mathcal{E}(\gamma)] \\ &\leq 2n^{-40} \leq n^{-10} \quad (\text{by Claim 14}) \end{aligned}$$

as required.  $\square$

## 1.3 Basic Taylor expansions

In this section we define the basic Taylor expansions of  $\tilde{q}(x)/p(x)$  that form the foundation of our analysis. Our analysis of (18) proceeds by first Taylor expanding  $M^{-1}$  and  $\det M$  around the identity matrix using Claims 9 and 10, which is valid since for any  $S \in \mathcal{E}(\gamma)$  for  $\gamma < 1/2$  one has  $\|I - M\|_2 \leq \|I - M\|_F \leq 1/2$ . This gives

$$\begin{aligned} \tilde{q}(x)/p(x) &= \mathbf{E}_S \left[ \exp \left( \frac{1}{2}x^T x - \frac{1}{2} \left( \sum_{k \geq 0} x^T (I - M)^k x \right) + \frac{1}{2} \sum_{k \geq 1} \text{Tr}((I - M)^k)/k \right) \Big| \mathcal{E} \right] \\ &= \mathbf{E}_S \left[ \exp \left( -\frac{1}{2}x^T (I - M)x + \frac{1}{2} \text{Tr}(I - M) - \frac{1}{2} \sum_{k \geq 2} (x^T (I - M)^k x - \text{Tr}((I - M)^k)/k) \right) \Big| \mathcal{E} \right] \\ &= \mathbf{E}_S \left[ \exp \left( -\frac{1}{2}x^T (I - M)x + \frac{1}{2} \text{Tr}(I - M) - R(x) \right) \Big| \mathcal{E} \right], \end{aligned} \tag{20}$$

where  $R(x) := \frac{1}{2} \sum_{k \geq 2} (x^T(I-M)^k x - \text{Tr}((I-M)^k)/k)$ .

The rationale behind the definition of  $\mathcal{E}(\gamma)$  is that for all  $S \in \mathcal{E}(\gamma)$  the residual  $R(x)$  above is (essentially) dominated by the quadratic terms, i.e.  $\|I-M\|_F^2$  and  $x^T(I-M)^2 x$  (for ‘typical’ values of  $x$  – see Lemma 18 below), i.e. we can truncate the Taylor expansion to the first and second terms and control the error. This is made formal by the following three lemmas.

**Lemma 16.** *For every  $\gamma \in (0, 1)$ , conditioned on  $\mathcal{E}(\gamma)$  we have  $\text{Tr}((I-M)^k) \leq \gamma^{k-2} \cdot \|I-M\|_F^2$  for all  $k \geq 2$ .*

*Proof.*  $|\text{Tr}((I-M)^k)| \leq \|I-M\|_2^{k-2} \cdot \text{Tr}((I-M)^2) \leq \|I-M\|_F^{k-2} \cdot \|I-M\|_F^2 \leq \gamma^k$  as required, since  $\|A\|_2 \leq \|A\|_F$  and  $\text{Tr}(A^T A) = \|A\|_F^2$  for all  $A \in \mathbb{R}^{d \times d}$ .  $\square$

**Lemma 17.** *For any matrix  $U \in \mathbb{R}^{n \times d}$  with orthonormal columns, any  $\gamma \in (0, 1/2)$ , for any  $x \in \mathbb{R}^d$  one has, for any CountSketch matrix  $S \in \mathcal{E}(\gamma)$ ,  $x^T(I-M)^k x \leq \gamma^{k-2} x^T(I-M)^2 x$  for any  $k \geq 2$ .*

*Proof.* We have, for any  $x \in \mathbb{R}^d$  and any  $S \in \mathcal{E}(\gamma)$   $|x^T(I-M)^k x| \leq \|I-M\|_2^{k-2} \cdot x^T(I-M)^2 x \leq \gamma^{k-2} \cdot x^T(I-M)^2 x$ , as  $\|I-M\|_2 \leq \|I-M\|_F$ .  $\square$

**Lemma 18.** *For any  $\gamma \in (0, 1/2)$ , any matrix  $U \in \mathbb{R}^{n \times d}$  with orthonormal columns, any CountSketch matrix  $S \in \mathcal{E}(\gamma)$  and any  $x \in \mathcal{T}(S, U)$  one has*

$$|R(x)| \leq \sum_{k \geq 2} |x^T(I-M)^k x| + |\text{Tr}((I-M)^k)|/k \leq C \|I-M\|_F^2 + C x^T(I-M)^2 x,$$

where  $C > 0$  is an absolute constant.

*Proof.* We have by combining Lemma 16 and Lemma 17

$$\begin{aligned} \sum_{k \geq 2} |x^T(I-M)^k x| + |\text{Tr}((I-M)^k)|/k &\leq \sum_{k \geq 2} [\gamma^{k-2} x^T(I-M)^2 x + \gamma^{k-2} \cdot \|I-M\|_F^2/k] \\ &\leq C(x^T(I-M)^2 x + \|I-M\|_F^2) \end{aligned}$$

for an absolute constant  $C' > 0$ , as  $\gamma < 1/2$  by assumption of the lemma.  $\square$

## 1.4 Constructing the universal set $\mathcal{T}^*(U, \gamma)$ of typical $x$

The main result of this section is the following lemma:

**Lemma 19.** *For every matrix  $U \in \mathbb{R}^{n \times d}$  with orthonormal columns, for every  $\gamma \in (0, 1/\log^2 n)$  and any  $\delta > 0$  if*

$$\begin{aligned} \mathcal{T}^*(U, \gamma) := \{x \in \mathbb{R}^d \text{ s.t. } \|x\|_\infty \leq C\sqrt{\log n} \text{ and} \\ |(Ux)_a| \leq O(\sqrt{\log n}) \|U_a\|_2 \text{ for all } a \in [n] \text{ and} \\ \mathbf{E}_S [\mathbf{I}[x \notin \mathcal{T}(S, U)] | \mathcal{E}(\gamma)] < 1/n^{25}\}, \end{aligned}$$

then (a)  $\Pr_{X \sim N(0, I_d)}[X \in \mathcal{T}^*(U, \gamma)] \geq 1 - n^{-10}$  and (b)  $\Pr_{X \sim \tilde{q}}[X \in \mathcal{T}^*(U, \gamma)] \geq 1 - n^{-10}$ .

Note that the lemma guarantees the existence of a universal set  $\mathcal{T}^* \subseteq \mathbb{R}^d$  that captures most of the probability mass of both the normal distribution  $N(0, I_d)$  and the mixture  $\tilde{q}$ .

**Proof of Lemma 19:**

Let

$$\begin{aligned} \mathcal{T}_1^* &:= \{x \in \mathbb{R}^d : \mathbf{E}_S [\mathbf{I}[x \notin \mathcal{T}(S, U)] | \mathcal{E}(\gamma)] < 1/n^{25}\}, \\ \mathcal{T}_2^* &:= \{x \in \mathbb{R}^d : \|x\|_\infty \leq C\sqrt{\log n}\}, \\ \mathcal{T}_3^* &:= \{x \in \mathbb{R}^d : |(Ux)_a| \leq C\sqrt{\log n} \|U_a\|_2 \text{ for all } a \in [n]\}. \end{aligned}$$

We prove that  $\mathcal{T}_i^*$ ,  $i = 1, 2, 3$  occur with high probability under both distributions. As we show below, the result then follows by a union bound.



**Showing that  $\mathcal{T}_1^*$  occurs with high probability.** We first show that  $\mathcal{T}_1^*$  occurs with high probability under the isotropic Gaussian distribution  $X \sim N(0, I_d)$ , and then show that it also occurs with high probability under the mixture of Gaussians distribution  $\tilde{q}$ . In both cases the proof proceeds by applying Claim 14 followed by Markov's inequality.

**Step 1: bounding  $\Pr_{X \sim N(0, I_d)}[\mathcal{T}_1^*]$ .** We have by Claim 14, (1) that  $\Pr_{X \sim N(0, I_d)}[\mathbf{I}[X \notin \mathcal{T}(S, U)]] < n^{-40}$ , and hence

$$\mathbf{E}_S [\mathbf{E}_{X \sim N(0, I_d)} [\mathbf{I}[X \notin \mathcal{T}(S, U)]] | \mathcal{E}(\gamma)] < 1/n^{40},$$

implying that  $\mathbf{E}_{X \sim N(0, I_d)} [\mathbf{E}_S [\mathbf{I}[X \notin \mathcal{T}(S, U)]] | \mathcal{E}(\gamma)] < 1/n^{40}$ . We thus get by Markov's inequality that  $\Pr_{X \sim N(0, I_d)}[\mathcal{T}_1^*] \geq 1 - n^{-15}$ .

**Step 2: bounding  $\Pr_{X \sim \tilde{q}}[\mathcal{T}_1^*]$ .** We have by Claim 14, (2) that for any  $U \in \mathbb{R}^{n \times d}$  with orthonormal columns, any pair of matrices  $S, S' \in \mathcal{E}(\gamma)$ , if  $M' = U^T S^T S U$ , then  $\Pr_{X \sim N(0, M')} [X \notin \mathcal{T}(S, U)] < n^{-40}$ . We thus have

$$\begin{aligned} \mathbf{E}_{X \sim \tilde{q}} [\mathbf{E}_S [\mathbf{I}[X \notin \mathcal{T}(S, U)]] | \mathcal{E}(\gamma)] &= \mathbf{E}_{S'} [\mathbf{E}_{X \sim q_{S'}} [\mathbf{E}_S [\mathbf{I}[X \notin \mathcal{T}(S, U)]] | \mathcal{E}(\gamma)] | \mathcal{E}(\gamma)] \\ &= \mathbf{E}_S [\mathbf{E}_{S'} [\mathbf{E}_{X \sim q_{S'}} [\mathbf{I}[X \notin \mathcal{T}(S, U)]] | \mathcal{E}(\gamma)] | \mathcal{E}(\gamma)] \\ &= \mathbf{E}_S [\Pr_{X \sim \tilde{q}} [\mathbf{I}[X \notin \mathcal{T}(S, U)]] | \mathcal{E}(\gamma)] \\ &\leq n^{-40}. \end{aligned}$$

By Markov's inequality applied to the expression in the first line we thus have

$$\Pr_{X \sim \tilde{q}} [\mathbf{E}_S [\mathbf{I}[X \notin \mathcal{T}(S, U)]] | \mathcal{E}(\gamma)] > n^{-25}] < n^{-15}.$$

**Showing that  $\mathcal{T}_2^*$  occurs with high probability.** The fact that

$$\Pr_{X \sim N(0, I_d)} [\|X\|_\infty \leq C\sqrt{\log n}] \geq 1 - n^{-40}$$

follows by standard properties of Gaussian random variables. Thus, it remains to show that  $\mathcal{T}_2^*$  occurs with high probability under  $X \sim \tilde{q}$ . For any  $U \in \mathbb{R}^{n \times d}$  and  $S \in \mathcal{E}(\gamma)$  we now prove that for  $M = U^T S^T S U$

$$\Pr_{X \sim N(0, M)} [\|X\|_\infty \leq C\sqrt{\log n}] \geq 1 - n^{-40} \tag{21}$$

It is convenient to let  $X = M^{1/2}Y$ , where  $Y \sim N(0, I_d)$  is a vector of independent Gaussians of unit variance. Then we need to bound

$$\Pr_{X \sim N(0, M)} [\|X\|_\infty \geq C\sqrt{\log n}] = \Pr_{Y \sim N(0, I_d)} [\|M^{1/2}Y\|_\infty \geq C\sqrt{\log n}]$$

By 2-stability of the Gaussian distribution we have that for each  $i = 1, \dots, d$  the random variable  $(M^{1/2}Y)_i$  is Gaussian with variance at most  $\|M^{1/2}\|_F^2$ , which we bound by

$$\begin{aligned} \|M^{1/2}\|_F &= \|(I + (M - I))^{1/2}\|_F = \left\| \sum_{t=0}^{\infty} \binom{1/2}{t} (I - M)^t \right\|_F \\ &\leq \sum_{t=0}^{\infty} \left| \binom{1/2}{t} \right| \cdot \|(I - M)^t\|_F \\ &\leq \sum_{t=0}^{\infty} \left| \binom{1/2}{t} \right| \cdot \|I - M\|_F^t \\ &\leq \sum_{t=0}^{\infty} \|I - M\|_F^t \\ &\leq \sum_{t=0}^{\infty} (1/2)^t \\ &\leq 2 \end{aligned}$$

Thus, for each  $i \in [n]$  the random variable  $(M^{1/2}Y)_i$  is Gaussian with variance at most 4, and (21) follows by standard properties of Gaussian random variables as long as  $C > 0$  is a sufficiently large constant.

**Showing that  $\mathcal{T}_3^*$  occurs with high probability.** The fact that

$$\Pr_{X \sim N(0, I_d)} \left[ |(UX)_a| \leq C\sqrt{\log n} \cdot \|U_a\|_2 \text{ for all } a \in [n] \right] \geq 1 - n^{-40}$$

follows by standard properties of Gaussian random variables and a union bound over all  $a \in [n]$ .

Thus, it remains to show that  $\mathcal{T}_3^*$  occurs with high probability under  $X \sim \tilde{q}$ . For any  $U \in \mathbb{R}^{n \times d}$  and  $S \in \mathcal{E}(\gamma)$  we now prove that for  $M = U^T S^T S U$

$$\Pr_{X \sim N(0, M)} \left[ |(UX)_a| \leq C\sqrt{\log n} \|U_a\|_2 \text{ for all } a \in [n] \right] \geq 1 - n^{-40}$$

It is convenient to let  $X = M^{1/2}Y$ , where  $Y \sim N(0, I_d)$  is a vector of independent Gaussians of unit variance. Then we need to bound, for each  $a \in [n]$

$$\Pr_{X \sim N(0, M)} \left[ |(UX)_a| \geq C\sqrt{\log n} \|U_a\|_2 \right] = \Pr_{Y \sim N(0, I_d)} \left[ |(UM^{1/2}Y)_a| \geq C\sqrt{\log n} \|U_a\|_2 \right]$$

By 2-stability of the Gaussian distribution we have that for each  $a = 1, \dots, n$  the random variable  $U_a M^{1/2}Y$  is Gaussian with variance at most  $\|U_a M^{1/2}\|_2^2 \leq 4\|U_a\|_F^2$  (since  $\gamma < 1/\log^2 n$  by assumption of the lemma), and hence the result follows by standard properties of Gaussian random variables and a union bound.

Finally, we let  $\mathcal{T}^* := \mathcal{T}_1^* \cap \mathcal{T}_2^* \cap \mathcal{T}_3^*$ . By a union bound applied to the bounds above we have that  $\mathcal{T}^*$  occurs with probability at least  $1 - n^{-10}$  under both distributions, as required.  $\square$

## 1.5 Proof of Lemma 8

We first prove

**Lemma 20.** *There exists an absolute constant  $C > 0$  such that for every  $\gamma \in (0, 1/\log n)$ , any matrix  $U \in \mathbb{R}^{n \times d}$  with orthonormal columns and any CountSketch matrix  $S \in \mathcal{E}(\gamma)$  and  $x \in \mathcal{T}(S, U)$  one has, letting*

$$L(x) := -\frac{1}{2}x^T(I - M)x + \frac{1}{2}\text{Tr}(I - M) - \frac{1}{8}x^T(I - M)x \cdot \text{Tr}(I - M)$$

and

$$Q(x) := ((x^T(I - M)x)^2 + (\text{Tr}(I - M))^2 + x^T(I - M)^2x + \|I - M\|_F^2),$$

that

$$\left| 1 + L(x) - \exp\left(\frac{1}{2}x^T x - \frac{1}{2}x^T M^{-1}x - \frac{1}{2}\log \det M\right) \right| \leq C \cdot Q(x).$$

The proof is given in section A.

We will need the following two lemmas, whose proofs are provided in section A.2

**Lemma 21.** *For any  $U \in \mathbb{R}^{n \times d}$  with orthonormal columns, and  $B \geq 1$ , if  $S$  is a random CountSketch matrix and  $M = U^T S^T S U$ , then*

- (1)  $\mathbf{E}_S[\|M - I\|_F^2] \leq 2d^2/B$
- (2) for all  $x \in \mathcal{T}^*$  one has  $\mathbf{E}_S[x^T(I - M)^2x] = O(d^2(\log^2 n)/B)$
- (3) for all  $x \in \mathcal{T}^*$  one has  $\mathbf{E}_S[(x^T(I - M)x)^2] = O(d^2(\log^2 n)/B)$
- (4) for all  $x \in \mathcal{T}^*$  one has  $\mathbf{E}_S[(x^T(I - M)x) \cdot \text{Tr}(I - M)] = O(d^2(\log n)/B)$
- (5) one has  $\mathbf{E}_S[(\text{Tr}(I - M))^2] = O(d^2/B)$

and

**Lemma 22** (Variance bound). *For any matrix  $U \in \mathbb{R}^{n \times d}$  with orthonormal columns if  $\gamma \in (0, 1/2)$  and  $\mathcal{T}^*(U, \gamma) \subseteq \mathbb{R}^d$  is as defined in Lemma 19, then for any  $x \in \mathcal{T}^*(U, \gamma)$  one has, for*

$$L(x) := -\frac{1}{2}x^T(I - M)x + \frac{1}{2}\text{Tr}(I - M) - \frac{1}{8}x^T(I - M)x \cdot \text{Tr}(I - M)$$

and

$$Q(x) := ((x^T(I - M)x)^2 + (\text{Tr}(I - M))^2 + x^T(I - M)^2x + \|I - M\|_F^2),$$

that for any constant  $C$

$$\mathbf{E}_S \left[ (L(x) + C \cdot Q(x))^2 \right] = O(d^2(\log^2 n)/B),$$

where  $S$  is a uniformly random CountSketch matrix and  $M = U^T S^T S U$ .

We will use the following lemma, whose proof is given in section A:

**Lemma 23.** *For any random variable  $Z$  and any event  $\mathcal{E}$  with  $\Pr[\mathcal{E}] \geq 1/2$ , if  $\epsilon := \mathbf{E}[(Z - 1)^2]$ , then*

$$|\mathbf{E}[Z] - \mathbf{E}[Z|\mathcal{E}]| \leq 2(1 + \mathbf{E}[Z])\Pr[\bar{\mathcal{E}}] + 2\sqrt{\epsilon\Pr[\bar{\mathcal{E}}]}.$$

Equipped with the bounds above, we can now prove Lemma 8:

**Lemma 8** (Restated) *There exists an absolute constant  $C > 0$  such that for every  $\delta \in (0, 1)$  and every matrix  $U \in \mathbb{R}^{n \times d}$  with orthonormal columns if  $B \geq \frac{1}{\delta}C(\log n)^4 d^2$  there exists a set  $\mathcal{E}$  of CountSketch matrices and a subset  $\mathcal{T}^* \subseteq \mathbb{R}^d$  that satisfies  $\Pr_{X \sim p}[X \notin \mathcal{T}^*] \leq n^{-10}$  and  $\Pr_{X \sim \bar{q}}[X \notin \mathcal{T}^*] \leq n^{-10}$  such that if  $S \in \mathbb{R}^{B \times n}$  is a random CountSketch matrix, then (1)  $\Pr_S[\mathcal{E}] \geq 1 - \delta/3$ , and (2) for all  $x \in \mathcal{T}^*$  one has*

$$\left| \frac{q'(x)}{p(x)} - 1 \right| \leq O((d^2 \log^4 n)/B) + O(n^{-10}).$$

*Proof.* Let  $\mathcal{T}^*(U, \gamma) \subseteq \mathbb{R}^d$  be as defined in Lemma 19, and let  $\gamma := 1/\log^2 n$ . Let  $\mathcal{E} := \mathcal{E}(\gamma)$ , and note that  $\Pr[\mathcal{E}] \geq 1 - \delta/3$  by Claim 11 as long as  $C$  is a large enough constant, as required.

We now bound

$$\frac{q'(x)}{p(x)} = \mathbf{E}_S \left[ \frac{q_S(x)}{p(x)} \cdot \mathbf{I}[x \in \mathcal{T}(S, U)] \middle| \mathcal{E}(\gamma) \right] + \xi,$$

for  $x \in \mathcal{T}^*(U, \gamma)$ , where  $\xi = \mathbf{E}_S[\Pr_{X \sim q_S}[X \in \mathcal{T}(S, U)]] \leq n^{-40}$  by definition and Claim 15, **(2)**. For each  $S \in \mathcal{E}(\gamma)$  and  $x \in \mathcal{T}(S, U)$  we have by Lemma 20

$$\left| \frac{q_S(x)}{p(x)} - (1 + L(x)) \right| = \left| \exp \left( \frac{1}{2}x^T x - \frac{1}{2}x^T M^{-1}x - \frac{1}{2} \log \det M \right) - (1 + L(x)) \right| \leq C \cdot Q(x),$$

where

$$L(x) := -\frac{1}{2}x^T(I - M)x + \frac{1}{2}\text{Tr}(I - M) - \frac{1}{8}x^T(I - M)x \cdot \text{Tr}(I - M)$$

denotes the ‘linear’ term and

$$Q(x) := (x^T(I - M)x)^2 + (\text{Tr}(I - M))^2 + x^T(I - M)^2x + \|I - M\|_F^2$$

denotes the ‘quadratic’ term.

Taking expectations, we get

$$\begin{aligned} & \mathbf{E}_S [(L(x) - C \cdot Q(x)) \cdot \mathbf{I}[x \in \mathcal{T}(S, U)] | \mathcal{E}(\gamma)] \\ & \leq \mathbf{E}_S \left[ \left( \exp \left( \frac{1}{2}x^T x - \frac{1}{2}x^T M^{-1}x - \frac{1}{2} \log \det M \right) - 1 \right) \cdot \mathbf{I}[x \in \mathcal{T}(S, U)] \middle| \mathcal{E}(\gamma) \right] \\ & \leq \mathbf{E}_S [(L(x) + C \cdot Q(x)) \cdot \mathbf{I}[x \in \mathcal{T}(S, U)] | \mathcal{E}(\gamma)]. \end{aligned}$$

Thus, it suffices to show that

$$|\mathbf{E}_S [(L(x) \pm C \cdot Q(x)) \cdot \mathbf{I}[x \in \mathcal{T}(S, U)] | \mathcal{E}(\gamma)]| = O((Cd \log n)^2/B) + O(n^{-10}),$$

which we do now. We only provide the analysis for the case when the sign in front of the constant  $C$  is a plus, as the other part is analogous.

We first show that removing the multiplier  $\mathbf{I}[x \in \mathcal{T}(S, U)]$  from the equation above only changes the expectation slightly. Specifically, note that

$$\begin{aligned} & |\mathbf{E}_S [(L(x) + C \cdot Q(x)) \cdot \mathbf{I}[x \in \mathcal{T}(S, U)] | \mathcal{E}(\gamma)] - \mathbf{E}_S [L(x) + C \cdot Q(x) | \mathcal{E}(\gamma)]| \\ & \leq \mathbf{E}_S [|L(x) + C \cdot Q(x)| \cdot \mathbf{I}[x \notin \mathcal{T}(S, U)] | \mathcal{E}(\gamma)]. \end{aligned} \tag{22}$$

By Claim 13 we have  $\|I - M\|_F^2 \leq 4n^3$  for all  $S$  and  $U$ , so every element of the matrix  $I - M$  is upper bounded by  $2n^2$ . Similarly, we have  $\|(I - M)^2\|_F \leq \|I - M\|_F^2$ , and so every element of  $(I - M)^2$  is upper bounded by  $4n^3$ . Thus, for any  $x \in \mathcal{T}^*(U, \gamma)$  one has

$$\begin{aligned} & |L(x) + CQ(x)| \\ & \leq (|x^T(I - M)x| + |\text{Tr}(I - M)| + |x^T(I - M)x \cdot \text{Tr}(I - M)|) \\ & \quad + C((x^T(I - M)x)^2 + (\text{Tr}(I - M))^2 + x^T(I - M)^2x + \|I - M\|_F^2) \\ & = O(\log n)(2n^2d^2 + d \cdot (2n^2) + (2n^2)^2d^3 + (2n^2d^2)^2 + (d \cdot 2n^2)^2 + 4n^4d^2 + 4n^3) \leq n^{10} \end{aligned}$$

as long as  $n$  is sufficiently large, where we used the fact that  $\|x\|_\infty \leq O(\sqrt{\log n})$  for all  $x \in \mathcal{T}^*(U, \gamma)$ .

Furthermore, by Lemma 19 we have for  $x \in \mathcal{T}^*(U, \gamma)$  that

$$\mathbf{E}_S [\mathbf{I}[x \notin \mathcal{T}(S, U)] | \mathcal{E}(\gamma)] < 1/n^{25}.$$

Substituting these two bounds into (22), we get

$$\mathbf{E}_S [|L(x) + C \cdot Q(x)| \cdot \mathbf{I}[x \notin \mathcal{T}(S, U)] | \mathcal{E}(\gamma)] \leq n^{-10} \quad (23)$$

so it remains to bound

$$\mathbf{E}_S [L(x) + C \cdot Q(x) | \mathcal{E}(\gamma)].$$

We bound the expectation above by relating it to the corresponding unconditional expectation. Let  $Z := 1 + (L(x) + C \cdot Q(x))$ , and note that

$$\mathbf{E}_S[Z] = 1 - \mathbf{E}_S\left[\frac{1}{8}x^T(I - M)x \cdot \text{Tr}(I - M)\right] + C \cdot \mathbf{E}_S[Q(x)] = 1 + O((C \log n)^2 d^2/B) \quad (24)$$

by Lemma 21. Let  $\epsilon := \mathbf{E}_S[(Z - 1)^2]$ . We note that by Lemma 22 that  $\epsilon \leq O(d^2(\log^2 n)/B)$ , and hence since  $\mathcal{E}(\gamma) \geq 1/2$  by Claim 11, by Lemma 23 we have

$$|\mathbf{E}[Z] - \mathbf{E}[Z | \mathcal{E}(\gamma)]| \leq 2(1 + \mathbf{E}[Z])\mathbf{Pr}[\bar{\mathcal{E}}(\gamma)] + 2\sqrt{\epsilon\mathbf{Pr}[\bar{\mathcal{E}}(\gamma)]}.$$

Since  $\mathbf{Pr}[\bar{\mathcal{E}}(\gamma)] \leq 3(d/\gamma)^2/B$  by Claim 11 and using the assumption that  $B \geq (\log^2 n)d^2$ , we get

$$|\mathbf{E}[Z] - \mathbf{E}[Z | \mathcal{E}(\gamma)]| \leq O((d/\gamma)^2/B) + 2\sqrt{O(d^2 \log^2 n/B) \cdot (d/\gamma)^2/B} = O\left(\left(\frac{1}{\gamma^2} + \frac{1}{\gamma} \log n\right)d^2/B\right) = O((d/\gamma)^2/B), \quad (25)$$

where we used the assumption that  $\gamma \leq 1/\log^2 n$ . Combining (25), (24) with (22) and (23), we get

$$\left| \frac{q'(x)}{p(x)} - 1 \right| = \left| \mathbf{E}_S \left[ \frac{q(x)}{p(x)} \cdot \mathbf{I}[x \in \mathcal{T}(U, S)] \mid \mathcal{E}(\gamma) \right] + \xi - 1 \right| \leq O((d^2 \log^4 n)/B) + O(1/n^{10}).$$

□

## A Proofs omitted from the main body

### A.1 Proof of Claim 14 and Claim 13

We will use

**Theorem 24** (Bernstein's inequality). *Let  $X_1, \dots, X_n$  be independent zero mean random variables such that  $|X_i| \leq L$  for all  $i$  with probability 1, and let  $X := \sum_{i=1}^n X_i$ . Then*

$$\mathbf{Pr}[X > t] < \exp\left(-\frac{\frac{1}{2}t^2}{\sum_{i=1}^n \mathbf{E}[X_i^2] + \frac{1}{3}Lt}\right).$$

**Proof of Claim 14:**

**Proving (1).** The bound follows by standard concentration inequalities, as we now show. Since the normal distribution is rotationally invariant, we have that

$$X^T(I - M)X = \sum_{i=1}^d (\lambda_i - 1)Y_i^2 = \text{Tr}(M - I) + \sum_{i=1}^d (\lambda_i - 1)(Y_i^2 - 1), \quad (26)$$

where  $Y \sim N(0, I_d)$  and  $\lambda_i$  are the eigenvalues of  $M$ . We now apply Bernstein's inequality (Theorem 24) to random variables  $(\lambda_i - 1)(Y_i^2 - 1)$  (note that they are zero mean). We also have  $\mathbf{E}[(\lambda_i - 1)^2(Y_i^2 - 1)^2] \leq$

$O((\lambda_i - 1)^2)$ . We later combine it with the fact that  $|\text{Tr}(I - M)| \leq \gamma \leq \frac{1}{2} \cdot \frac{1}{100}$  for all  $S \in \mathcal{E}(\gamma)$  to obtain the result. We also have  $|(\lambda_i - 1)Y_i| \leq \|I - M\|_F C \sqrt{\log n} \leq \gamma \cdot C \sqrt{\log n}$  for all  $i$  with probability at least  $1 - n^{-40}/4$  as long as  $C > 0$  is larger than an absolute constant. We thus have by applying Theorem 24 to random variables clipped at  $\gamma C \sqrt{\log n}$  in magnitude, which we denote by event  $\mathcal{F}$ , to conclude for all  $t \geq 0$ ,

$$\Pr\left[\sum_{i=1}^d (\lambda_i - 1)(Y_i^2 - 1) > t \mid \mathcal{F}\right] < 2 \exp\left(-\frac{\frac{1}{2}t^2}{O(\sum_{i=1}^d (\lambda_i - 1)^2) + (\frac{1}{3}\gamma C \sqrt{\log n})t}\right).$$

Note the random variables are still independent and zero-mean conditioned on  $\mathcal{F}$ , and  $\mathbf{E}[(\lambda_i - 1)^2(Y_i^2 - 1)^2] \leq O((\lambda_i - 1)^2)$  continues to hold, since the clipping changes the expectation by at most a factor of  $(1 + O(n^{-40}))$ . By a union bound we can remove the conditioning on  $\mathcal{F}$ ,

$$\Pr\left[\sum_{i=1}^d (\lambda_i - 1)(Y_i^2 - 1) > t\right] < 2 \exp\left(-\frac{\frac{1}{2}t^2}{O(\sum_{i=1}^d (\lambda_i - 1)^2) + (\frac{1}{3}\gamma C \sqrt{\log n})t}\right) + \frac{n^{-40}}{4}.$$

Setting  $t = \frac{1}{100}$ , and using the fact that  $\sum_i (\lambda_i - 1)^2 = \|I - M\|_F^2 \leq \gamma^2$ , we get

$$\begin{aligned} \Pr\left[\sum_{i=1}^d (\lambda_i - 1)(Y_i^2 - 1) > \frac{1}{2} \cdot \frac{1}{100}\right] &< 2 \exp\left(-\frac{\frac{1}{2}(\frac{1}{2} \cdot \frac{1}{100})^2}{O(\gamma^2) + (\frac{1}{3} \cdot (\frac{1}{2} \cdot \frac{1}{100})\gamma C \sqrt{\log n})t}\right) + \frac{n^{-40}}{4} \\ &= \exp(-\Omega(1/(\gamma \sqrt{\log n}))) + \frac{n^{-40}}{4} \\ &< \frac{n^{-40}}{2}, \end{aligned}$$

since  $\gamma \leq 1/\log^2 n$  by assumption, for a sufficiently large  $n$ . Combining this with (26), we get, using the fact that  $|\text{Tr}(I - M)| \leq \gamma < \frac{1}{2} \cdot \frac{1}{100}$  for  $S \in \mathcal{E}(\gamma)$  that

$$\Pr[X^T(I - M)X > \frac{1}{100}] \leq \Pr\left[\left|\sum_{i=1}^d (\lambda_i - 1)(Y_i^2 - 1)\right| > \frac{1}{2} \frac{1}{100}\right] < n^{-40}/2,$$

as required.

We also have

$$X^T(I - M)^2 X = \sum_{i=1}^d (\lambda_i - 1)^2 Y_i^2 \leq \|I - M\|_F^2 \cdot \max_{i \in [d]} |Y_i|^2 \leq O(\log n) \cdot \|I - M\|_F^2 = O(\log n \gamma^2) \leq \frac{1}{100}$$

with probability at least  $1 - n^{-40}/2$  by standard properties of Gaussian random variables. Putting the two estimates together and taking a union bound over the failure events now shows that  $\Pr_{X \sim N(0, I_d)}[X \notin \mathcal{T}(S, U)] < n^{-40}$ , as required.

**Proving (2).** Recall that  $\mathcal{T}(S, U) = \{x \in \mathbb{R}^d : |x^T(I - M)x| \leq \frac{1}{100} \text{ and } x^T(I - M)^2 x \leq \frac{1}{100}\}$ . For any  $S'$  we have that  $X \sim N(0, M')$ , where  $M' = (S'U)^T S'U$ , so  $X = M'^{1/2}Y$ , where  $Y = N(0, I_d)$ . We thus have

$$X^T(I - M)X = (M'^{1/2}Y)^T(I - M)(M'^{1/2}Y) = Y^T M'^{1/2}(I - M)M'^{1/2}Y.$$

We now show that

$$\Pr_{Y \sim N(0, I_d)}\left[\left|Y^T M'^{1/2}(I - M)M'^{1/2}Y\right| > \frac{1}{100}\right] < 1/n^{20} \quad (27)$$

Let  $Q := M'^{1/2}(I - M)M'^{1/2}$ , and let  $1 - \tilde{\lambda}_i, i = 1, \dots, d$  denote the eigenvalues of  $Q$ . We have

$$Y^T M'^{1/2}(I - M)M'^{1/2}Y = \sum_{i=1}^d (1 - \tilde{\lambda}_i) Z_i^2,$$

where  $Z \sim N(0, I_d)$ . Note that

$$\begin{aligned} \left| \sum_{i=1}^d (1 - \tilde{\lambda}_i) \right| &= |\text{Tr}(Q)| = |\text{Tr}(M'^{1/2}(I - M)M'^{1/2})| \\ &= |\text{Tr}(M'(I - M))| = |\text{Tr}((I - (I - M'))(I - M))| \\ &\leq |\text{Tr}(I - M)| + |\text{Tr}((I - M')(I - M))| \\ &= \gamma + |\text{Tr}((I - M')(I - M))| \quad (\text{since } |\text{Tr}(I - M)| \leq \gamma \text{ for all } S \in \mathcal{E}(\gamma)) \\ &\leq \gamma + \|I - M'\|_F \cdot \|M - I\|_F \quad (\text{by von Neumann and Cauchy-Schwarz inequalities}) \\ &\leq \gamma + \gamma^2 \end{aligned} \tag{28}$$

We thus have

$$\begin{aligned} Y^T M'^{1/2}(I - M)M'^{1/2}Y &= \sum_{i=1}^d (1 - \tilde{\lambda}_i) Z_i^2 \\ &= \sum_{i=1}^d (1 - \tilde{\lambda}_i) + \sum_{i=1}^d (1 - \tilde{\lambda}_i)(Z_i^2 - 1) \end{aligned} \tag{29}$$

We now use a calculation analogous to the above for **(1)** to show that  $|\sum_{i=1}^d (1 - \tilde{\lambda}_i)(Z_i^2 - 1)| \leq \frac{1}{2} \cdot \frac{1}{100}$  with probability at least  $1 - n^{-40}/4$ . Indeed, we first verify that the variance is bounded by

$$\begin{aligned} O\left(\sum_{i=1}^d (1 - \tilde{\lambda}_i)^2\right) &= O(\|Q\|_F^2) \\ &= O(\|M'^{1/2}(I - M)M'^{1/2}\|_F^2) \\ &\leq O(\|M'\|_2^2 \|I - M\|_F^2) \quad (\text{by sub-multiplicativity}) \\ &\leq O((\|I\|_2 + \|M' - I\|_F)^2 \|I - M\|_F^2) \\ &\leq O(\|I - M\|_F^2) \\ &= O(\gamma^2). \end{aligned} \tag{30}$$

We also have

$$\begin{aligned} |(1 - \tilde{\lambda}_i)Y_i| &\leq \|Q\|_F C \sqrt{\log n} \\ &\leq \|M'\|_2 \|I - M\|_F C \sqrt{\log n} \quad (\text{by sub-multiplicativity}) \\ &\leq (\|I\|_2 + \|M' - I\|_F) \|I - M\|_F C \sqrt{\log n} \\ &\leq 2\|I - M\|_F C \sqrt{\log n} \\ &\leq 2\gamma \cdot C \sqrt{\log n}, \end{aligned}$$

for all  $i$  with probability at least  $1 - 1/n^{40}/5$  as long as  $C > 0$  is larger than an absolute constant. We thus have by Theorem 24 (applied to clipped variables and then unclipping by a union bound as in **(1)**) for all  $t \geq 0$  that

$$\mathbf{Pr}\left[|Y^T M'^{1/2}(I - M)M'^{1/2}Y - \sum_{i=1}^d (1 - \tilde{\lambda}_i)| > t\right] < \exp\left(-\frac{\frac{1}{2}t^2}{O(\sum_{i=1}^d (1 - \tilde{\lambda}_i)^2) + (\frac{1}{3}2\gamma C \sqrt{\log n})t}\right) + n^{-40}/5.$$

Setting  $t = \frac{1}{2} \frac{1}{100}$ , and using the upper bound  $O(\sum_i (1 - \tilde{\lambda}_i)^2) = O(\gamma^2)$  obtained in (30), we get

$$\begin{aligned} \Pr[|Y^T M^{1/2}(I - M)M^{1/2}Y - \sum_{i=1}^d (1 - \tilde{\lambda}_i)| > \frac{1}{2} \cdot \frac{1}{100}] &< \exp\left(-\frac{\frac{1}{2}(\frac{1}{2} \cdot \frac{1}{100})^2}{C\gamma^2 + (\frac{1}{3} \cdot \frac{1}{2} \cdot \frac{1}{100} \gamma C \sqrt{\log n})}\right) + n^{-40}/5 \\ &= \exp(-\Omega(1/(\gamma\sqrt{\log n}))) + n^{-40}/5 < n^{-40}/4 \end{aligned}$$

since  $\gamma \leq 1/\log^2 n$  by assumption, for a sufficiently large  $n$ . Since  $|\sum_{i=1}^d (1 - \tilde{\lambda}_i)| \leq \gamma + 2\gamma^2 \leq \frac{1}{2} \cdot \frac{1}{100}$  by (28), we get by triangle inequality that

$$\Pr_{X \sim N(0, M')} [|X^T (I - M)X| > \frac{1}{100}] \leq n^{-40}/4.$$

Similarly to (1) above, we have, when  $X \sim N(0, M')$ ,  $X = M'^{1/2}Y$ ,  $Y \sim N(0, I_d)$ ,

$$\begin{aligned} X^T (I - M)^2 X &= Y^T M'^{1/2} (I - M)^2 M'^{1/2} Y = \sum_{i=1}^d \tilde{\tau}_i Z_i^2 \\ &\leq \text{Tr}(M'^{1/2} (I - M)^2 M'^{1/2}) \cdot \max_{i \in [d]} Z_i^2 \\ &\leq O(\log n) \cdot \text{Tr}(M'^{1/2} (I - M)^2 M'^{1/2}) \end{aligned}$$

with probability at least  $1 - n^{-40}/2$  over the choice of  $X$ , as  $\max_{i \in [d]} Z_i^2 \leq C \log n$  with high probability if  $C$  is a sufficiently large constant by standard properties of Gaussian random variables. Since  $\text{Tr}(M'^{1/2} (I - M)^2 M'^{1/2}) = \text{Tr}(M' (I - M)^2) \leq 2\|I - M\|_F^2$  (as  $\gamma < 1/\log^2 n < 1/3$  by assumption of the lemma), we get

$$X^T (I - M)^2 X \leq O(\log n) \cdot \text{Tr}(M'^{1/2} (I - M)^2 M'^{1/2}) \leq O(\log n) \cdot \gamma^2 \leq \frac{1}{100} \quad (\text{since } \gamma < 1/\log^2 n)$$

with probability at least  $1 - n^{-40}/4$ . A union bound over the failure events yields  $\Pr_{X \sim N(0, M')} [X \notin \mathcal{T}(S, U)] < n^{-40}$ , as required.

This completes the proof.  $\square$

**Proof of Lemma 20:** By assumption that  $S \in \mathcal{E}(\gamma)$  we have that  $\|I - M\|_2 \leq \gamma$ , so Taylor expansion is valid and gives

$$\frac{1}{2}x^T x - \frac{1}{2}x^T M^{-1}x - \frac{1}{2} \log \det M = -\frac{1}{2}x^T (I - M)x + \frac{1}{2} \text{Tr}(I - M) + R(x),$$

where for all  $x \in \mathcal{T}(S, U)$  one has  $R(x) \leq \sum_{k \geq 2} x^T (I - M)^k x + \text{Tr}(I - M)^k$ .

We have by Lemma 18 that  $R(x) \leq C(x^T (I - M)^2 x + \|I - M\|_F^2)$  for an absolute constant  $C > 0$ , for all  $x \in \mathcal{T}(S, U)$  and  $S \in \mathcal{E}(\gamma)$ . We thus have

$$\begin{aligned} &e^{-\frac{1}{2}x^T (I - M)x + \frac{1}{2} \text{Tr}(I - M) - C(x^T (I - M)^2 x + \|I - M\|_F^2)} \\ &\leq e^{-\frac{1}{2}x^T x + \frac{1}{2} \text{Tr}(I - M) - \frac{1}{2}x^T M^{-1}x - \frac{1}{2} \log \det M} \\ &\leq e^{-\frac{1}{2}x^T (I - M)x + \frac{1}{2} \text{Tr}(I - M) + C(x^T (I - M)^2 x + \|I - M\|_F^2)} \end{aligned} \quad (31)$$

for all such  $M$  and  $x$ .

We now Taylor expand  $e^{-\frac{1}{2}x^T (I - M)x + \frac{1}{2} \text{Tr}(I - M) + A(x^T (I - M)^2 x + \|I - M\|_F^2)}$ , where  $A$  is any constant (positive or negative), getting

$$\begin{aligned} &e^{-\frac{1}{2}x^T (I - M)x + \frac{1}{2} \text{Tr}(I - M) + A(x^T (I - M)^2 x + \|I - M\|_F^2)} \\ &= \sum_{k \geq 1} \left( -\frac{1}{2}x^T (I - M)x + \frac{1}{2} \text{Tr}(I - M) + A(x^T (I - M)^2 x + \|I - M\|_F^2) \right)^k / k!. \end{aligned} \quad (32)$$



For  $k = 2$  we have

$$\left| \left( -\frac{1}{2}x^T(I-M)x + \frac{1}{2}\text{Tr}(I-M) + x^T(I-M)^2x + \|I-M\|_F^2 \right)^2 / 2 + \frac{1}{8}x^T(I-M)x \cdot \text{Tr}(I-M) \right| \quad (33)$$

$$\leq C \left( (x^T(I-M)x)^2 + (\text{Tr}(I-M))^2 + x^T(I-M)^2x + \|I-M\|_F^2 \right),$$

where we used the fact  $|x^T(I-M)x| \leq \frac{1}{100}$  for  $x \in \mathcal{T}(S, U)$  and  $|\text{Tr}(I-M)| \leq \gamma < \frac{1}{100}$  for  $S \in \mathcal{E}(\gamma)$ .

For all  $k \geq 3$  we use the bound

$$\begin{aligned} & \left| \left( -\frac{1}{2}x^T(I-M)x + \frac{1}{2}\text{Tr}(I-M) + x^T(I-M)^2x + \|I-M\|_F^2 \right)^k \right| \\ & \leq \left( |x^T(I-M)x| + \frac{1}{2}|\text{Tr}(I-M)| + x^T(I-M)^2x + \|I-M\|_F^2 \right)^k \\ & \leq \left( |x^T(I-M)x| + \frac{1}{2}|\text{Tr}(I-M)| + x^T(I-M)^2x + \|I-M\|_F^2 \right)^3 \\ & \leq C \left( (x^T(I-M)x)^2 + (\text{Tr}(I-M))^2 + x^T(I-M)^2x + \|I-M\|_F^2 \right), \end{aligned} \quad (34)$$

where we used the bound  $|x^T(I-M)x| + \frac{1}{2}|\text{Tr}(I-M)| + x^T(I-M)^2x + \|I-M\|_F^2 \leq 1$  to go from the second line to the third, and the last line follows from the observation that every term in the expansion of  $(|x^T(I-M)x| + \frac{1}{2}|\text{Tr}(I-M)| + x^T(I-M)^2x + \|I-M\|_F^2)^3$  contains either at least a square of one of the first two terms or at least one of the last two.

Substituting these bounds into (32), we get

$$\begin{aligned} & e^{-\frac{1}{2}x^T(I-M)x + \frac{1}{2}\text{Tr}(I-M) + A(x^T(I-M)^2x + \|I-M\|_F^2)} \\ & = \sum_{k \geq 1} \left( -\frac{1}{2}x^T(I-M)x + \frac{1}{2}\text{Tr}(I-M) + A(x^T(I-M)^2x + \|I-M\|_F^2) \right)^k / k! \\ & \leq -\frac{1}{2}x^T(I-M)x + \frac{1}{2}\text{Tr}(I-M) - \frac{1}{8}x^T(I-M)x \cdot \text{Tr}(I-M) \\ & \quad + C \left( (x^T(I-M)x)^2 + x^T(I-M)^2x + \text{Tr}(I-M)^2 + \|I-M\|_F^2 \right) \quad (\text{for a constant } C > 0 \text{ that may depend on } A) \\ & \quad + \sum_{k \geq 3} (A+1)^k \left( (x^T(I-M)x)^2 + \text{Tr}(I-M)^2 + x^T(I-M)^2x + \|I-M\|_F^2 \right) / k! \\ & \leq -\frac{1}{2}x^T(I-M)x + \frac{1}{2}\text{Tr}(I-M) + C'' \left( x^T(I-M)^2x + (\text{Tr}(I-M))^2 + x^T(I-M)x^2 + \|I-M\|_F^2 \right) \end{aligned}$$

for an absolute constant  $C'' > 0$ . This provides the upper bound in the claimed result. The lower bound is provided by a similar calculation, which we omit.  $\square$

**Proof of Lemma 23:** Since  $\mathbf{E}[(Z-1)^2] \leq \epsilon$  by assumption of the lemma, for any event  $\mathcal{E}$  one has  $\mathbf{E}[(Z-1)^2 \cdot \mathbf{I}_{\bar{\mathcal{E}}}] \leq \epsilon$ , where  $\mathbf{I}_{\bar{\mathcal{E}}}$  is the indicator of  $\bar{\mathcal{E}}$ , the complement of  $\mathcal{E}$ . This also means that

$$\mathbf{E}[(Z-1)^2 | \bar{\mathcal{E}}] \leq \epsilon / \mathbf{Pr}[\bar{\mathcal{E}}].$$

On the other hand, by Jensen's inequality

$$\mathbf{E}[|Z-1| | \bar{\mathcal{E}}] \leq \left( \mathbf{E}[(Z-1)^2 | \bar{\mathcal{E}}] \right)^{1/2},$$

and putting these two bounds together we get

$$\mathbf{E}[|Z-1| \cdot \mathbf{I}[\bar{\mathcal{E}}]] = \mathbf{E}[|Z-1| | \bar{\mathcal{E}}] \cdot \mathbf{Pr}[\bar{\mathcal{E}}] \leq \mathbf{Pr}[\bar{\mathcal{E}}] \cdot \left( \mathbf{E}[(Z-1)^2 | \bar{\mathcal{E}}] \right)^{1/2} \leq \mathbf{Pr}[\bar{\mathcal{E}}] \cdot (\epsilon / \mathbf{Pr}[\bar{\mathcal{E}}])^{1/2} = \sqrt{\epsilon \cdot \mathbf{Pr}[\bar{\mathcal{E}}]}.$$

This means that

$$\begin{aligned}
|\mathbf{E}[Z] - \mathbf{E}[Z|\mathcal{E}]| &\leq \left| \mathbf{E}[Z] - \frac{1}{\Pr[\mathcal{E}]} \mathbf{E}[Z \cdot \mathbf{I}_{\mathcal{E}}] \right| \\
&\leq \left| \mathbf{E}[Z] - \frac{1}{\Pr[\mathcal{E}]} \mathbf{E}[Z] + \frac{1}{\Pr[\mathcal{E}]} \mathbf{E}[Z \cdot \mathbf{I}_{\bar{\mathcal{E}}}] \right| \\
&\leq \mathbf{E}[Z] \left( \frac{1}{1 - \Pr[\bar{\mathcal{E}}]} - 1 \right) + \left| \frac{1}{\Pr[\mathcal{E}]} \mathbf{E}[Z \cdot \mathbf{I}_{\bar{\mathcal{E}}}] \right| \\
&\leq \mathbf{E}[Z] \cdot 2\Pr[\bar{\mathcal{E}}] + 2\mathbf{E}[Z \cdot \mathbf{I}_{\bar{\mathcal{E}}}] \quad (\text{since } \frac{1}{1-x} - 1 \leq 2x \text{ for } x \in (0, 1/2)) \\
&\leq \mathbf{E}[Z] \cdot 2\Pr[\bar{\mathcal{E}}] + 2(\Pr[\bar{\mathcal{E}}] + \mathbf{E}[|Z-1| \cdot \mathbf{I}_{\bar{\mathcal{E}}}]) \\
&\leq 2(1 + \mathbf{E}[Z])\Pr[\bar{\mathcal{E}}] + 2\sqrt{\epsilon\Pr[\bar{\mathcal{E}}]}.
\end{aligned}$$

□

## A.2 Proofs of moment bounds (Lemma 21 and Lemma 22)

**Proof of Lemma 21 and Lemma 22:** We start by noting that for every  $i, j \in [1 : d]$  the matrix  $M = U^T S^T S U$  satisfies

$$\begin{aligned}
M_{ij} &= \sum_{r=1}^B \sum_{a=1}^n \sum_{b=1}^n S_{r,a} U_{a,i} S_{r,b} U_{b,j} \\
&= \sum_{a=1}^n U_{a,i} U_{a,j} \left( \sum_{r=1}^B S_{r,a}^2 \right) + \sum_{r=1}^B \sum_{a=1}^n \sum_{b=1, b \neq a}^n S_{r,a} U_{a,i} S_{r,b} U_{b,j} \\
&= \delta_{i,j} + \sum_{r=1}^B \sum_{\substack{a,b=1, \\ a \neq b}}^n S_{r,a} U_{a,i} S_{r,b} U_{b,j},
\end{aligned}$$

where  $\delta_{i,j}$  equals 1 if  $i = j$  and equals 0 otherwise. We thus have, for every  $i, j \in [1 : d]$ , that

$$(M - I)_{ij} = \sum_{r=1}^B \sum_{\substack{a,b=1, \\ a \neq b}}^n S_{r,a} U_{a,i} S_{r,b} U_{b,j},$$

which in particular means that

$$\begin{aligned}
\text{Tr}(I - M) &= - \sum_i (M - I)_{ii} = - \sum_i \sum_{r=1}^B \sum_{\substack{a,b=1, \\ a \neq b}}^n S_{r,a} U_{a,i} S_{r,b} U_{b,i}, \\
&= - \sum_{r=1}^B \sum_{\substack{a,b=1, \\ a \neq b}}^n S_{r,a} S_{r,b} \cdot U_a U_b^T,
\end{aligned} \tag{35}$$

(note that it immediately follows that  $\mathbf{E}_S[\text{Tr}(I - M)] = 0$ , as  $\mathbf{E}_S[S_{r,a} S_{r,b}] = 0$  for  $a \neq b$ ) and

$$\begin{aligned}
x^T (I - M) x &= - \sum_{ij} (M - I)_{ij} x_i x_j = - \sum_{i,j} \sum_{r=1}^B \sum_{\substack{a,b=1, \\ a \neq b}}^n S_{r,a} U_{a,i} S_{r,b} U_{b,j} x_i x_j \\
&= - \sum_{r=1}^B \sum_{\substack{a,b=1, \\ a \neq b}}^n S_{r,a} S_{r,b} (Ux)_a (Ux)_b
\end{aligned} \tag{36}$$

(note that it immediately follows that  $\mathbf{E}_S[x^T(I-M)x] = 0$  for all  $x$ , as  $\mathbf{E}_S[S_{r,a}S_{r,b}] = 0$  for  $a \neq b$ ).

We also have

$$(M-I)_{ij}^2 = \sum_{r=1}^B \sum_{\substack{a,b=1, \\ a \neq b}}^n \sum_{r'=1}^B \sum_{\substack{c,d=1, \\ c \neq d}}^n S_{r,a}U_{a,i}S_{r,b}U_{b,j}S_{r',c}U_{c,i}S_{r',d}U_{d,j}$$

and hence

$$\begin{aligned} \|I-M\|_F^2 &= \sum_{ij} (M-I)_{ij}^2 = \sum_{ij} \sum_{r=1}^B \sum_{\substack{a,b=1, \\ a \neq b}}^n \sum_{r'=1}^B \sum_{\substack{c,d=1, \\ c \neq d}}^n S_{r,a}U_{a,i}S_{r,b}U_{b,j}S_{r',c}U_{c,i}S_{r',d}U_{d,j} \\ &= \sum_{r=1}^B \sum_{\substack{a,b=1, \\ a \neq b}}^n \sum_{r'=1}^B \sum_{\substack{c,d=1, \\ c \neq d}}^n S_{r,a}S_{r,b}S_{r',c}S_{r',d} \left( \sum_i U_{a,i}U_{c,i} \right) \left( \sum_j U_{b,j}U_{d,j} \right) \\ &= \sum_{r=1}^B \sum_{\substack{a,b=1, \\ a \neq b}}^n \sum_{r'=1}^B \sum_{\substack{c,d=1, \\ c \neq d}}^n S_{r,a}S_{r,b}S_{r',c}S_{r',d} \cdot U_a U_c^T \cdot U_b U_d^T \\ &= \sum_{r_1=1}^B \sum_{\substack{a_1,b_1=1, \\ a_1 \neq b_1}}^n \sum_{r_2=1}^B \sum_{\substack{a_2,b_2=1, \\ a_2 \neq b_2}}^n S_{r_1,a_1}S_{r_1,b_1}S_{r_2,a_2}S_{r_2,b_2} \cdot U_{a_1}U_{a_2}^T \cdot U_{b_1}U_{b_2}^T \end{aligned} \tag{37}$$

We also need

$$\begin{aligned} x^T(I-M)^2x &= \|(I-M)x\|_2^2 = \sum_{i=1}^d \left( \sum_{j=1}^d (I-M)_{ij}x_j \right)^2 \\ &= \sum_{i=1}^d \sum_{j=1}^d \sum_{\bar{j}=1}^d x_j x_{\bar{j}} \cdot \sum_{r=1}^B \sum_{\substack{\bar{r}=1 \\ a \neq b}}^B \sum_{\substack{a,b=1, \\ a \neq b}}^n \sum_{\substack{\bar{a},\bar{b}=1, \\ \bar{a} \neq \bar{b}}}^n S_{r,a}U_{a,i}S_{r,b}U_{b,j} \cdot S_{\bar{r},\bar{a}}U_{\bar{a},i}S_{\bar{r},\bar{b}}U_{\bar{b},\bar{j}} \\ &= \sum_{r=1}^B \sum_{\substack{\bar{r}=1 \\ a \neq b}}^B \sum_{\substack{a,b=1, \\ a \neq b}}^n \sum_{\substack{\bar{a},\bar{b}=1, \\ \bar{a} \neq \bar{b}}}^n S_{r,a}S_{r,b}S_{\bar{r},\bar{a}}S_{\bar{r},\bar{b}} \cdot \left( \sum_{i=1}^d U_{a,i}U_{\bar{a},i} \right) \left( \sum_{j=1}^d U_{b,j}x_j \right) \left( \sum_{\bar{j}} U_{\bar{b},\bar{j}}x_{\bar{j}} \right) \\ &= \sum_{r=1}^B \sum_{\substack{\bar{r}=1 \\ a \neq b}}^B \sum_{\substack{a,b=1, \\ a \neq b}}^n \sum_{\substack{\bar{a},\bar{b}=1, \\ \bar{a} \neq \bar{b}}}^n S_{r,a}S_{r,b}S_{\bar{r},\bar{a}}S_{\bar{r},\bar{b}} \cdot U_a U_{\bar{a}}^T \cdot (Ux)_b (Ux)_{\bar{b}} \\ &= \sum_{r_1=1}^B \sum_{r_2=1}^B \sum_{\substack{a_1,b_1=1, \\ a_1 \neq b_1}}^n \sum_{\substack{a_2,b_2=1, \\ a_2 \neq b_2}}^n S_{r_1,a_1}S_{r_1,b_1}S_{r_2,a_2}S_{r_2,b_2} \cdot U_{a_1}U_{a_2}^T \cdot (Ux)_{b_1} (Ux)_{b_2} \end{aligned} \tag{38}$$

**Bounding  $\mathbf{E}_S[\|I-M\|_F^2]$ ,  $\mathbf{E}_S[(x^T(I-M)x)^2]$ ,  $\mathbf{E}_S[x^T(I-M)^2x]$ ,  $\mathbf{E}_S[(x^T(I-M)x)\text{Tr}(I-M)]$ ,  $\mathbf{E}_S[\text{Tr}(I-M)^2]$**

We first note that for any  $r_1, r_2$  and  $a_1 \neq b_1, a_2 \neq b_2$  the quantity

$$\mathbf{E}_S[S_{r_1,a_1}S_{r_1,b_1}S_{r_2,a_2}S_{r_2,b_2}]$$

is only nonzero when  $r_1 = r_2$  and  $\{a_1, b_1, a_2, b_2\}$  contains two distinct elements, each with multiplicity 2 (let  $\mathbf{I}_*(\{a_q, b_q\}_{q=1}^2)$  denote the indicator of the latter condition). In that case one has  $\mathbf{E}_S[S_{r_1,a_1}S_{r_1,b_1}S_{r_2,a_2}S_{r_2,b_2}] =$

$1/B^2$ . Note that the expression above appears in all of  $\mathbf{E}_S[(x^T(I-M)x)^2]$ ,  $\mathbf{E}_S[x^T(I-M)^2x]$ ,  $\mathbf{E}_S[(x^T(I-M)x)\text{Tr}(I-M)]$ ,  $\mathbf{E}_S[(\text{Tr}(I-M))^2]$ . Specifically, all of these expressions can be written as

$$\sum_{r_1=1}^B \sum_{r_2=1}^B \sum_{\substack{a_1, b_1=1, \\ a_1 \neq b_1}}^n \sum_{\substack{a_2, b_2=1, \\ a_2 \neq b_2}}^n \mathbf{E}_S[S_{r_1, a_1} S_{r_1, b_1} S_{r_2, a_2} S_{r_2, b_2}] \\ \cdot (U_{a_1} U_{a_2}^T)^A (U_{b_1} U_{b_2}^T)^B \cdot ((Ux)_{a_1} (Ux)_{a_2})^C ((Ux)_{b_1} (Ux)_{b_2})^D \cdot ((Ux)_{a_1} (Ux)_{b_1})^E (U_{a_1} U_{b_1}^T)^F \cdot ((Ux)_{a_2} (Ux)_{b_2})^G (U_{a_2} U_{b_2}^T)^H,$$

where  $A, B, C, D, E, F, G, H \in \{0, 1\}$  and  $A + B + C + D + E + F + G + H = 2$ . We thus have

$$\left| \sum_{r_1=1}^B \sum_{r_2=1}^B \sum_{\substack{a_1, b_1=1, \\ a_1 \neq b_1}}^n \sum_{\substack{a_2, b_2=1, \\ a_2 \neq b_2}}^n \mathbf{E}_S[S_{r_1, a_1} S_{r_1, b_1} S_{r_2, a_2} S_{r_2, b_2}] \cdot (U_{a_1} U_{a_2}^T)^A (U_{b_1} U_{b_2}^T)^B \cdot ((Ux)_{a_1} (Ux)_{a_2})^C ((Ux)_{b_1} (Ux)_{b_2})^D \cdot ((Ux)_{a_1} (Ux)_{b_1})^E (U_{a_1} U_{b_1}^T)^F \cdot ((Ux)_{a_2} (Ux)_{b_2})^G (U_{a_2} U_{b_2}^T)^H \right| \\ \leq \frac{1}{B} \sum_{\substack{a_1, b_1=1, \\ a_1 \neq b_1}}^n \sum_{\substack{a_2, b_2=1, \\ a_2 \neq b_2}}^n \mathbf{I}_*(\{a_q, b_q\}_{q=1}^2) |U_{a_1} U_{a_2}^T|^A |U_{b_1} U_{b_2}^T|^B \cdot |(Ux)_{a_1} (Ux)_{a_2}|^C |(Ux)_{b_1} (Ux)_{b_2}|^D \cdot |(Ux)_{a_1} (Ux)_{b_1}|^E |U_{a_1} U_{b_1}^T|^F \cdot |(Ux)_{a_2} (Ux)_{b_2}|^G |U_{a_2} U_{b_2}^T|^H.$$

We have  $|U_a U_b^T| \leq \|U_a\|_2 \cdot \|U_b\|_2$  by Cauchy-Schwarz, and  $|(Ux)_a| \leq \|U_a\|_2 \cdot O(\sqrt{\log n})$  since  $x \in \mathcal{T}^*$  by assumption of the lemma, so

$$\frac{1}{B} \sum_{\substack{a_1, b_1=1, \\ a_1 \neq b_1}}^n \sum_{\substack{a_2, b_2=1, \\ a_2 \neq b_2}}^n \mathbf{I}_*(\{a_q, b_q\}_{q=1}^2) |U_{a_1} U_{a_2}^T|^A |U_{b_1} U_{b_2}^T|^B \cdot |(Ux)_{a_1} (Ux)_{a_2}|^C |(Ux)_{b_1} (Ux)_{b_2}|^D \cdot |(Ux)_{a_1} (Ux)_{b_1}|^E |U_{a_1} U_{b_1}^T|^F \\ \leq (O(\log n))^{C+D+E+G} \frac{1}{B} \sum_{\substack{a_1, b_1=1, \\ a_1 \neq b_1}}^n \sum_{\substack{a_2, b_2=1, \\ a_2 \neq b_2}}^n \mathbf{I}_*(\{a_q, b_q\}_{q=1}^2) (\|U_{a_1}\|_2 \|U_{a_2}\|_2)^A \cdot (\|U_{b_1}\|_2 \|U_{b_2}\|_2)^B \cdot (\|U_{a_1}\|_2 \|U_{a_2}\|_2)^C \\ \cdot (\|U_{b_1}\|_2 \|U_{b_2}\|_2)^D \cdot (\|U_{a_1}\|_2 \|U_{b_1}\|_2)^E (\|U_{a_1}\|_2 \|U_{b_1}\|_2)^F \cdot (\|U_{a_2}\|_2 \|U_{b_2}\|_2)^G (\|U_{a_2}\|_2 \|U_{b_2}\|_2)^H.$$

Since we are only summing over  $\{a_1, a_2, b_1, b_2\}$  that contain two distinct elements, we have

$$(O(\log n))^{C+D+E+G} \frac{1}{B} \sum_{\substack{a_1, b_1=1, \\ a_1 \neq b_1}}^n \sum_{\substack{a_2, b_2=1, \\ a_2 \neq b_2}}^n \mathbf{I}_*(\{a_q, b_q\}_{q=1}^2) (\|U_{a_1}\|_2 \|U_{a_2}\|_2)^A \cdot (\|U_{b_1}\|_2 \|U_{b_2}\|_2)^B \cdot (\|U_{a_1}\|_2 \|U_{a_2}\|_2)^C \\ \cdot (\|U_{b_1}\|_2 \|U_{b_2}\|_2)^D \cdot (\|U_{a_1}\|_2 \|U_{b_1}\|_2)^E (\|U_{a_1}\|_2 \|U_{b_1}\|_2)^F \cdot (\|U_{a_2}\|_2 \|U_{b_2}\|_2)^G (\|U_{a_2}\|_2 \|U_{b_2}\|_2)^H \\ \leq (O(\log n))^{C+D+E+G} \frac{1}{B} \sum_{a_1, b_1=1}^n \|U_{a_1}\|_2^2 \|U_{a_2}\|_2^2 \\ \leq (O(\log n))^{C+D+E+G} \frac{1}{B} \left( \sum_{a_1=1}^n \|U_{a_1}\|_2^2 \right)^2 \\ \leq (O(\log n))^{C+D+E+G} \frac{d^2}{B},$$

where we used the fact that  $\sum_a \|U_a\|_2^2 = d$ . Noting that  $C + D + E + G = 0$  for  $\mathbf{E}_S[\|I - M\|_F^2]$  and  $C + D + E + G = 1$  for  $\mathbf{E}_S[x^T(I - M)x\text{Tr}(I - M)]$  completes the proof.

**Bounding**  $\mathbf{E}_S[(x^T(I-M)x)^2\text{Tr}(I-M)]$ ,  $\mathbf{E}_S[x^T(I-M)^2x\cdot\text{Tr}(I-M)]$ ,  $\mathbf{E}_S[\|I-M\|_F^2\cdot\text{Tr}(I-M)]$ ,  $\mathbf{E}_S[(x^T(I-M)x)^2\cdot x^T(I-M)x]$ ,  $\mathbf{E}_S[x^T(I-M)^2x\cdot x^T(I-M)x]$ ,  $\mathbf{E}_S[\|I-M\|_F^2\cdot x^T(I-M)x]$  All of the above expressions can be written as

$$\begin{aligned} & \sum_{r_1=1}^B \sum_{r_2=1}^B \sum_{r_3=1}^B \sum_{\substack{a_1, b_1=1, \\ a_1 \neq b_1}}^n \sum_{\substack{a_2, b_2=1, \\ a_2 \neq b_2}}^n \sum_{\substack{a_3, b_3=1, \\ a_3 \neq b_3}}^n \mathbf{E}_S[S_{r_1, a_1} S_{r_1, b_1} S_{r_2, a_2} S_{r_2, b_2} S_{r_3, a_3} S_{r_3, b_3}] \\ & \cdot (U_{a_1} U_{a_2}^T)^A (U_{b_1} U_{b_2}^T)^B \cdot ((Ux)_{a_1} (Ux)_{a_2})^C ((Ux)_{b_1} (Ux)_{b_2})^D \cdot ((Ux)_{a_1} (Ux)_{b_1})^E (U_{a_1} U_{b_1}^T)^F \cdot ((Ux)_{a_2} (Ux)_{b_2})^G (U_{a_2} U_{b_2}^T)^H \\ & \cdot ((Ux)_{a_3} (Ux)_{b_3})^I (U_{a_3} U_{b_3}^T)^J \end{aligned}$$

where  $A, B, C \dots$  are in  $\{0, 1\}$  and  $A + B + C + D + E + F + G + H + I + J = 3$ .

We first note that for any  $r_1, r_2, r_3$  and  $a_1 \neq b_1, a_2 \neq b_2, a_3 \neq b_3$  the quantity

$$\mathbf{E}_S[S_{r_1, a_1} S_{r_1, b_1} S_{r_2, a_2} S_{r_2, b_2} S_{r_3, a_3} S_{r_3, b_3}]$$

is only nonzero when  $r_1 = r_2 = r_3$  and  $\{a_1, b_1, a_2, b_2, a_3, b_3\}$  contains three distinct elements, each with multiplicity 2. Let  $\mathbf{I}_*(\{a_q, b_q\}_{q=1}^3)$  denote the indicator of the latter condition. In that case one has  $\mathbf{E}_S[S_{r_1, a_1} S_{r_1, b_1} S_{r_2, a_2} S_{r_2, b_2} S_{r_3, a_3} S_{r_3, b_3}] = 1/B^3$ . Note we cannot have  $a_1 = a_2 = a_3$  and  $b_1 = b_2 = b_3$  since the expectation is 0 in that case.

Similarly to the above, it thus suffices to bound

$$\begin{aligned} & \frac{1}{B^2} \sum_{\substack{a_1, b_1=1, a_2, b_2=1, a_3, b_3=1, \\ a_1 \neq b_1, a_2 \neq b_2, a_3 \neq b_3}}^n \sum_{\substack{a_1, b_1=1, a_2, b_2=1, a_3, b_3=1, \\ a_1 \neq b_1, a_2 \neq b_2, a_3 \neq b_3}}^n \sum_{\substack{a_1, b_1=1, a_2, b_2=1, a_3, b_3=1, \\ a_1 \neq b_1, a_2 \neq b_2, a_3 \neq b_3}}^n \mathbf{I}_*(\{a_q, b_q\}_{q=1}^3) \\ & \cdot |(U_{a_1} U_{a_2}^T)^A (U_{b_1} U_{b_2}^T)^B \cdot ((Ux)_{a_1} (Ux)_{a_2})^C ((Ux)_{b_1} (Ux)_{b_2})^D \cdot ((Ux)_{a_1} (Ux)_{b_1})^E (U_{a_1} U_{b_1}^T)^F \cdot ((Ux)_{a_2} (Ux)_{b_2})^G (U_{a_2} U_{b_2}^T)^H \\ & \cdot ((Ux)_{a_3} (Ux)_{b_3})^I (U_{a_3} U_{b_3}^T)^J| \\ & \leq (O(\log n))^{C+D+E+G+I} \frac{1}{B^2} \sum_{\substack{a_1, b_1=1, a_2, b_2=1, a_3, b_3=1, \\ a_1 \neq b_1, a_2 \neq b_2, a_3 \neq b_3}}^n \sum_{\substack{a_1, b_1=1, a_2, b_2=1, a_3, b_3=1, \\ a_1 \neq b_1, a_2 \neq b_2, a_3 \neq b_3}}^n \sum_{\substack{a_1, b_1=1, a_2, b_2=1, a_3, b_3=1, \\ a_1 \neq b_1, a_2 \neq b_2, a_3 \neq b_3}}^n \mathbf{I}_*(\{a_q, b_q\}_{q=1}^3) \cdot \\ & \cdot (\|U_{a_1}\|_2 \|U_{a_2}\|_2)^A (\|U_{b_1}\|_2 \|U_{b_2}\|_2)^B \cdot (\|U_{a_1}\|_2 \|U_{a_2}\|_2)^C (\|U_{b_1}\|_2 \|U_{b_2}\|_2)^D \cdot (\|U_{a_1}\|_2 \|U_{b_1}\|_2)^E (\|U_{a_1}\|_2 \|U_{b_1}\|_2)^F \\ & \cdot (\|U_{a_2}\|_2 \|U_{b_2}\|_2)^G (\|U_{a_2}\|_2 \|U_{b_2}\|_2)^H \cdot (\|U_{a_3}\|_2 \|U_{b_3}\|_2)^I (\|U_{a_3}\|_2 \|U_{b_3}\|_2)^J \end{aligned}$$

where we used Cauchy-Schwarz and the assumption that  $x \in \mathcal{T}^*$  (and hence  $x$  is not correlated with any of the rows of  $U$  too much), as above.

Since we are only summing over  $\{a_1, a_2, a_3, b_1, b_2, b_3\}$  that contain three distinct elements, the expression above is upper bounded by

$$\begin{aligned} & (O(\log n))^{C+D+E+G+I} \frac{1}{B^2} \sum_{a, c, b}^n \|U_a\|_2^2 \|U_b\|_2^2 \|U_c\|_2^2 \\ & \leq (O(\log n))^{C+D+E+G+I} \frac{d^3}{B^2} \\ & \leq (O(\log n))^2 \frac{d^2}{B}, \end{aligned}$$

where we used the fact that  $\sum_a \|U_a\|_2^2 = d$  and that in all cases,  $C + D + E + G + I \leq 2$ .

**Bounding  $\mathbf{E}_S$**   $[(x^T(I-M)x)^2 + x^T(I-M)^2x + \|I-M\|_F^2 + (\text{Tr}(I-M))^2]$  All of the pairwise products arising in the expansion of the above expressions can be written as

$$\begin{aligned} & \sum_{r_1=1}^B \sum_{r_2=1}^B \sum_{r_3=1}^B \sum_{\substack{a_1, b_1=1, \\ a_1 \neq b_1}}^n \sum_{\substack{a_2, b_2=1, \\ a_2 \neq b_2}}^n \sum_{\substack{a_3, b_3=1, \\ a_3 \neq b_3}}^n \sum_{\substack{a_4, b_4=1, \\ a_4 \neq b_4}}^n \mathbf{E}_S[S_{r_1, a_1} S_{r_1, b_1} S_{r_2, a_2} S_{r_2, b_2} S_{r_3, a_3} S_{r_3, b_3} S_{r_4, a_4} S_{r_4, b_4}] \\ & \cdot (U_{a_1} U_{a_2}^T)^A (U_{b_1} U_{b_2}^T)^B \cdot ((Ux)_{a_1} (Ux)_{a_2})^C ((Ux)_{b_1} (Ux)_{b_2})^D \cdot ((Ux)_{a_1} (Ux)_{b_1})^E (U_{a_1} U_{b_1}^T)^F \cdot ((Ux)_{a_2} (Ux)_{b_2})^G (U_{a_2} U_{b_2}^T)^H \\ & \cdot (U_{a_3} U_{a_4}^T)^{A'} (U_{b_3} U_{b_4}^T)^{B'} \cdot ((Ux)_{a_3} (Ux)_{a_4})^{C'} ((Ux)_{b_3} (Ux)_{b_4})^{D'} \cdot ((Ux)_{a_3} (Ux)_{b_3})^{E'} (U_{a_3} U_{b_3}^T)^{F'} \cdot ((Ux)_{a_4} (Ux)_{b_4})^{G'} (U_{a_4} U_{b_4}^T)^{H'}, \end{aligned}$$

where  $A, B, C, D, E, F, G, H, A', B', C', D', E', F', G', H' \in \{0, 1\}$  and add up to 4.

We now need to consider two cases.

**Case 1:** the number of distinct elements in  $\{a_1, b_1, a_2, b_2, a_3, b_3, a_4, b_4\}$  is four, each occurring with multiplicity 2 (let  $\mathbf{I}_*(\{a_q, b_q\}_{q=1}^4)$  denote the indicator of the latter condition) Then

$$\mathbf{E}_S[S_{r_1, a_1} S_{r_1, b_1} S_{r_2, a_2} S_{r_2, b_2} S_{r_3, a_3} S_{r_3, b_3} S_{r_4, a_4} S_{r_4, b_4}]$$

contributes  $1/B^4$ . In this case the number of distinct elements in  $\{r_1, r_2, r_3, r_4\}$  cannot be larger than 2.

It thus suffices to bound

$$\begin{aligned} & \frac{1}{B^2} \sum_{\substack{a_1, b_1=1, \\ a_1 \neq b_1}}^n \sum_{\substack{a_2, b_2=1, \\ a_2 \neq b_2}}^n \sum_{\substack{a_3, b_3=1, \\ a_3 \neq b_3}}^n \sum_{\substack{a_4, b_4=1, \\ a_4 \neq b_4}}^n \mathbf{I}_*(\{a_q, b_q\}_{q=1}^4) \cdot \\ & \cdot |(U_{a_1} U_{a_2}^T)^A (U_{b_1} U_{b_2}^T)^B \cdot ((Ux)_{a_1} (Ux)_{a_2})^C ((Ux)_{b_1} (Ux)_{b_2})^D \cdot ((Ux)_{a_1} (Ux)_{b_1})^E (U_{a_1} U_{b_1}^T)^F \cdot ((Ux)_{a_2} (Ux)_{b_2})^G (U_{a_2} U_{b_2}^T)^H \\ & \cdot (U_{a_3} U_{a_4}^T)^{A'} (U_{b_3} U_{b_4}^T)^{B'} \cdot ((Ux)_{a_3} (Ux)_{a_4})^{C'} ((Ux)_{b_3} (Ux)_{b_4})^{D'} \cdot ((Ux)_{a_3} (Ux)_{b_3})^{E'} (U_{a_3} U_{b_3}^T)^{F'} \cdot ((Ux)_{a_4} (Ux)_{b_4})^{G'} (U_{a_4} U_{b_4}^T)^{H'}| \\ & \leq (O(\log n))^2 \frac{1}{B^2} \sum_{\substack{a_1, b_1=1, \\ a_1 \neq b_1}}^n \sum_{\substack{a_2, b_2=1, \\ a_2 \neq b_2}}^n \sum_{\substack{a_3, b_3=1, \\ a_3 \neq b_3}}^n \mathbf{I}_*(\{a_q, b_q\}_{q=1}^4) \cdot \\ & \cdot (\|U_{a_1}\|_2 \|U_{a_2}\|_2)^A (\|U_{b_1}\|_2 \|U_{b_2}\|_2)^B \cdot (\|U_{a_1}\|_2 \|U_{a_2}\|_2)^C (\|U_{b_1}\|_2 \|U_{b_2}\|_2)^D \cdot (\|U_{a_1}\|_2 \|U_{b_1}\|_2)^E (\|U_{a_1}\|_2 \|U_{b_1}\|_2)^F \\ & \cdot (\|U_{a_2}\|_2 \|U_{b_2}\|_2)^G (\|U_{a_2}\|_2 \|U_{b_2}\|_2)^H \\ & \cdot (\|U_{a_3}\|_2 \|U_{a_4}\|_2)^{A'} (\|U_{b_3}\|_2 \|U_{b_4}\|_2)^{B'} \cdot (\|U_{a_3}\|_2 \|U_{a_4}\|_2)^{C'} (\|U_{b_3}\|_2 \|U_{b_4}\|_2)^{D'} \cdot (\|U_{a_3}\|_2 \|U_{b_3}\|_2)^{E'} (\|U_{a_3}\|_2 \|U_{b_3}\|_2)^{F'} \\ & \cdot (\|U_{a_4}\|_2 \|U_{b_4}\|_2)^{G'} (\|U_{a_4}\|_2 \|U_{b_4}\|_2)^{H'} \end{aligned}$$

where we used Cauchy-Schwarz and the assumption that  $x \in \mathcal{T}^*$  (and hence  $x$  is not correlated with any of the rows of  $U$  too much), as above.

Since we are only summing over  $\{a_1, a_2, a_3, a_4, b_1, b_2, b_3, b_4\}$  that contain three distinct elements, each of multiplicity two, the expression above is upper bounded by

$$\begin{aligned} & (O(\log n))^2 \frac{1}{B^2} \sum_{a, b, c, d}^n \|U_a\|_2^2 \|U_b\|_2^2 \|U_c\|_2^2 \|U_d\|_2^2 \\ & \leq (O(\log n))^2 \frac{d^4}{B^2} \\ & \leq (O(\log n))^2 \frac{d^2}{B}, \end{aligned}$$

where we used the fact that  $\sum_a \|U_a\|_2^2 = d$ .

**Case 2:** the number of distinct elements in  $\{a_1, b_1, a_2, b_2, a_3, b_3, a_4, b_4\}$  is two, each occurring with multiplicity 4 (let  $\mathbf{I}_*(\{a_q, b_q\}_{q=1}^4)$  denote the indicator of the latter condition) Then

$$\mathbf{E}_S[S_{r_1, a_1} S_{r_1, b_1} S_{r_2, a_2} S_{r_2, b_2} S_{r_3, a_3} S_{r_3, b_3} S_{r_4, a_4} S_{r_4, b_4}]$$

contributes  $1/B^2$ . In this case the number of distinct elements in  $\{r_1, r_2, r_3, r_4\}$  has to be one, since each column of  $S$  has a single non-zero entry and necessarily  $a_1 = a_2 = a_3 = a_4$  and  $b_1 = b_2 = b_3 = b_4$ .

It thus suffices to bound

$$\begin{aligned} & \frac{1}{B} \sum_{\substack{a_1, b_1=1, a_2, b_2=1, a_3, b_3=1, a_4, b_4=1, \\ a_1 \neq b_1, a_2 \neq b_2, a_3 \neq b_3, a_4 \neq b_4}}^n \sum_{a_1, b_1=1, a_2, b_2=1, a_3, b_3=1, a_4, b_4=1, \\ a_1 \neq b_1, a_2 \neq b_2, a_3 \neq b_3, a_4 \neq b_4}}^n \sum_{a_1, b_1=1, a_2, b_2=1, a_3, b_3=1, a_4, b_4=1, \\ a_1 \neq b_1, a_2 \neq b_2, a_3 \neq b_3, a_4 \neq b_4}}^n \sum_{a_1, b_1=1, a_2, b_2=1, a_3, b_3=1, a_4, b_4=1, \\ a_1 \neq b_1, a_2 \neq b_2, a_3 \neq b_3, a_4 \neq b_4}}^n \mathbf{I}_*(\{a_q, b_q\}_{q=1}^4) \cdot \\ & \cdot |(U_{a_1} U_{a_2}^T)^A (U_{b_1} U_{b_2}^T)^B \cdot ((Ux)_{a_1} (Ux)_{a_2})^C ((Ux)_{b_1} (Ux)_{b_2})^D \cdot ((Ux)_{a_1} (Ux)_{b_1})^E (U_{a_1} U_{b_1}^T)^F \cdot ((Ux)_{a_2} (Ux)_{b_2})^G (U_{a_2} U_{b_2}^T)^H \\ & \cdot (U_{a_3} U_{a_4}^T)^{A'} (U_{b_3} U_{b_4}^T)^{B'} \cdot ((Ux)_{a_3} (Ux)_{a_4})^{C'} ((Ux)_{b_3} (Ux)_{b_4})^{D'} \cdot ((Ux)_{a_3} (Ux)_{b_3})^{E'} (U_{a_3} U_{b_3}^T)^{F'} \cdot ((Ux)_{a_4} (Ux)_{b_4})^{G'} (U_{a_4} U_{b_4}^T)^{H'}| \\ & \leq (O(\log n))^2 \frac{1}{B} \sum_{\substack{a_1, b_1=1, a_2, b_2=1, a_3, b_3=1, a_4, b_4=1, \\ a_1 \neq b_1, a_2 \neq b_2, a_3 \neq b_3, a_4 \neq b_4}}^n \sum_{a_1, b_1=1, a_2, b_2=1, a_3, b_3=1, a_4, b_4=1, \\ a_1 \neq b_1, a_2 \neq b_2, a_3 \neq b_3, a_4 \neq b_4}}^n \sum_{a_1, b_1=1, a_2, b_2=1, a_3, b_3=1, a_4, b_4=1, \\ a_1 \neq b_1, a_2 \neq b_2, a_3 \neq b_3, a_4 \neq b_4}}^n \sum_{a_1, b_1=1, a_2, b_2=1, a_3, b_3=1, a_4, b_4=1, \\ a_1 \neq b_1, a_2 \neq b_2, a_3 \neq b_3, a_4 \neq b_4}}^n \mathbf{I}_*(\{a_q, b_q\}_{q=1}^4) \cdot \\ & \cdot (\|U_{a_1}\|_2 \|U_{a_2}\|_2)^A (\|U_{b_1}\|_2 \|U_{b_2}\|_2)^B \cdot (\|U_{a_1}\|_2 \|U_{a_2}\|_2)^C (\|U_{b_1}\|_2 \|U_{b_2}\|_2)^D \cdot (\|U_{a_1}\|_2 \|U_{b_1}\|_2)^E (\|U_{a_1}\|_2 \|U_{b_1}\|_2)^F \\ & \cdot (\|U_{a_2}\|_2 \|U_{b_2}\|_2)^G (\|U_{a_2}\|_2 \|U_{b_2}\|_2)^H \\ & \cdot (\|U_{a_3}\|_2 \|U_{a_4}\|_2)^{A'} (\|U_{b_3}\|_2 \|U_{b_4}\|_2)^{B'} \cdot (\|U_{a_3}\|_2 \|U_{a_4}\|_2)^{C'} (\|U_{b_3}\|_2 \|U_{b_4}\|_2)^{D'} \cdot (\|U_{a_3}\|_2 \|U_{b_3}\|_2)^{E'} (\|U_{a_3}\|_2 \|U_{b_3}\|_2)^{F'} \\ & \cdot (\|U_{a_4}\|_2 \|U_{b_4}\|_2)^{G'} (\|U_{a_4}\|_2 \|U_{b_4}\|_2)^{H'} \end{aligned}$$

where we used Cauchy-Schwarz and the assumption that  $x \in \mathcal{T}^*$  (and hence  $x$  is not correlated with any of the rows of  $U$  too much), as above.

Since we are only summing over  $\{a_1, a_2, a_3, a_4, b_1, b_2, b_3, b_4\}$  that contain two distinct elements, each of multiplicity four, the expression above is upper bounded by

$$\begin{aligned} & (O(\log n))^2 \frac{1}{B} \sum_{a, b}^n \|U_a\|_2^4 \|U_b\|_2^4 \\ & = (O(\log n))^2 \frac{1}{B} \sum_{a, b}^n \|U_a\|_2^2 \|U_b\|_2^2 \quad (\text{since } \|U_a\|_2 \leq 1 \text{ for all } a) \\ & \leq (O(\log n))^2 \frac{d^2}{B}, \end{aligned}$$

where we used the fact that  $\sum_a \|U_a\|_2^2 = d$ .

□
